# Supplementary material for: Acceptorless oxidant-free dehydrogenation of amines catalyzed by Ru–hydride complexes of amide-acid/ester ligands
Source: Royal Society of Chemistry journal article supplement (doi:10.1039/d4dt03201b), 2025-01-01
Supplement: d4dt03201b1.pdf [file d4dt03201b1.pdf]

## **Electronic Supplementary Information**

**for the manuscript entitled**

### **Acceptorless oxidant-free dehydrogenation of amines catalyzed by Ru-hydride complexes of amide-acid/ester ligands**

Samanta Yadav and Rajeev Gupta\*

Department of Chemistry, University of Delhi, Delhi 110007, India

E-mail: [rgupta@chemistry.du.ac.in](mailto:rgupta@chemistry.du.ac.in)

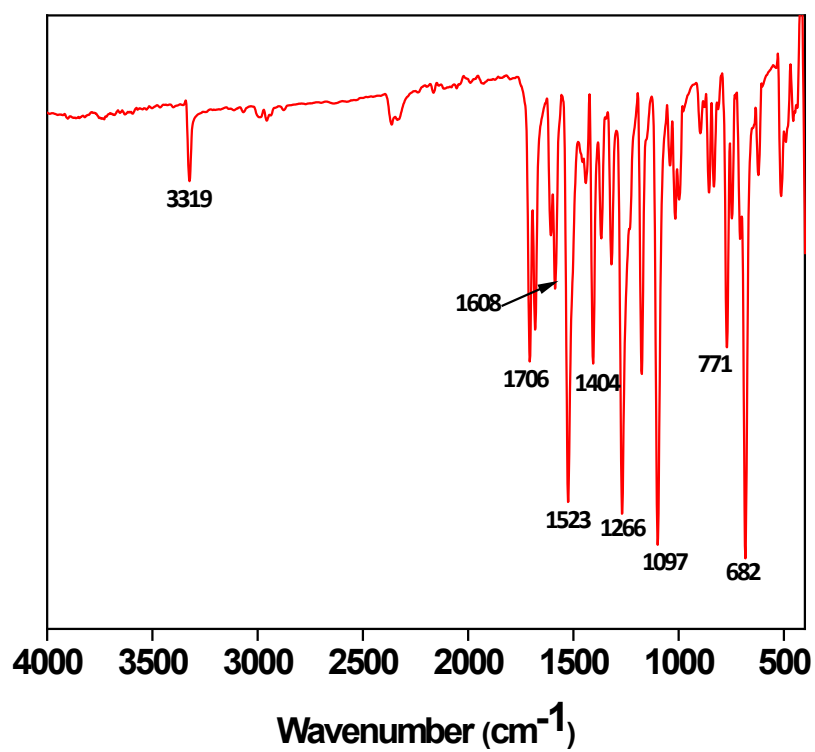

**Figure S1.** FTIR spectrum of ligand HL1.

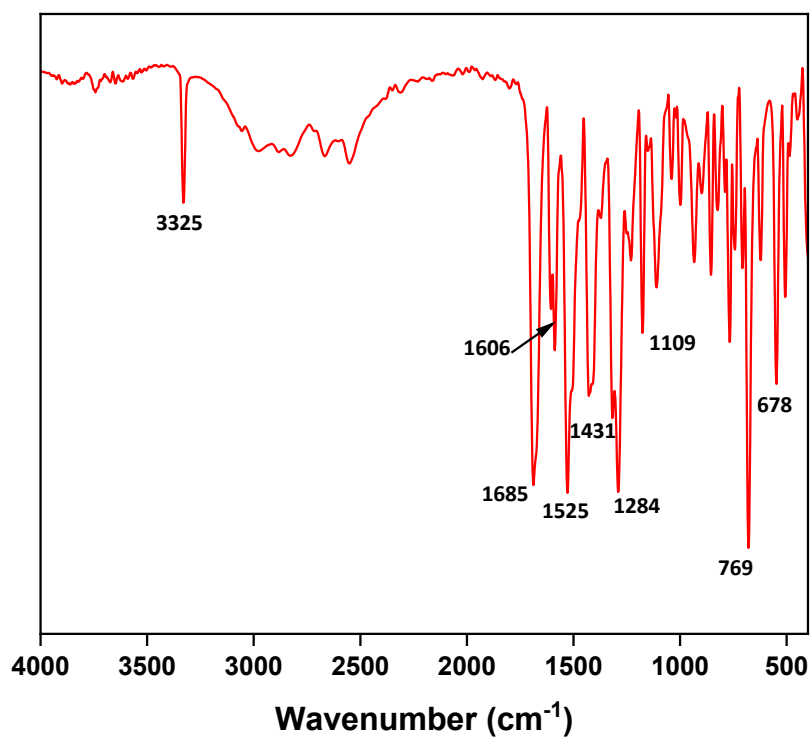

**Figure S2.** FTIR spectrum of ligand HL2.

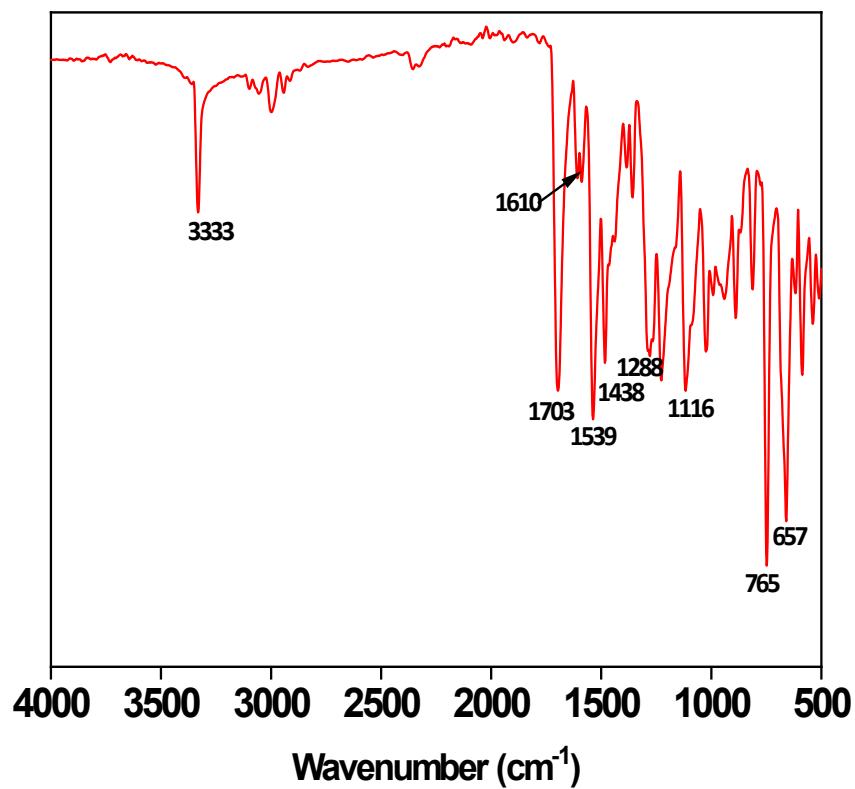

Figure S3. FTIR spectrum of ligand HL3.

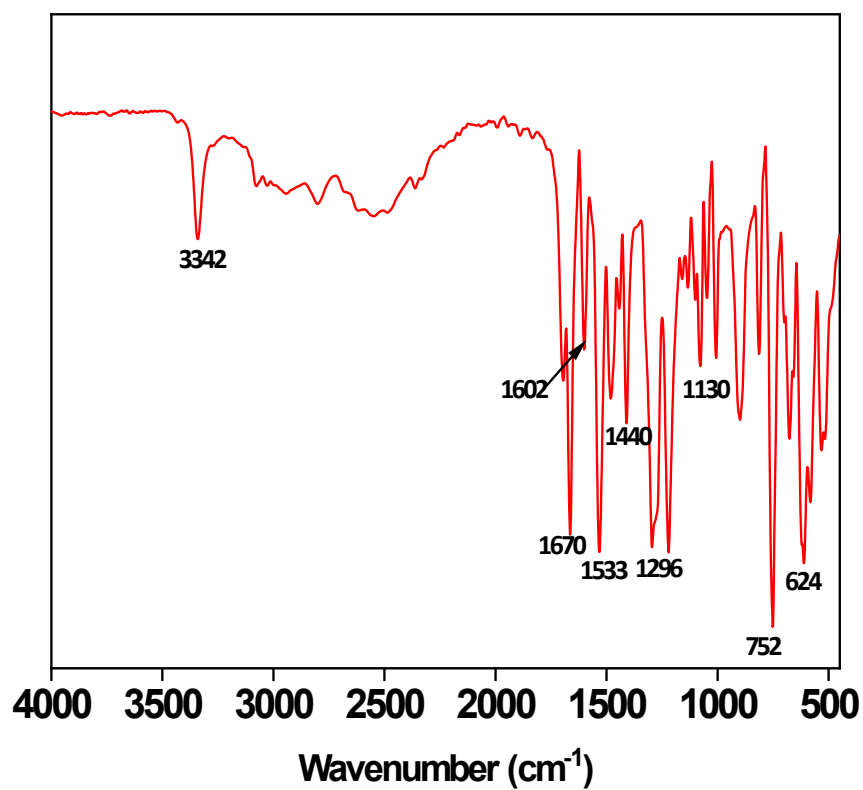

Figure S4. FTIR spectrum of ligand HL4.

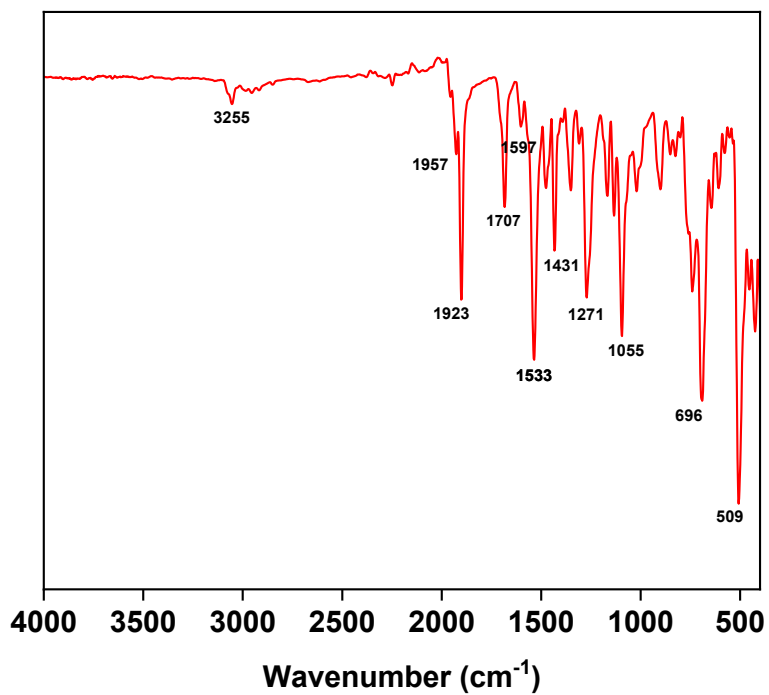

Figure S5. FTIR spectrum of complex 1.

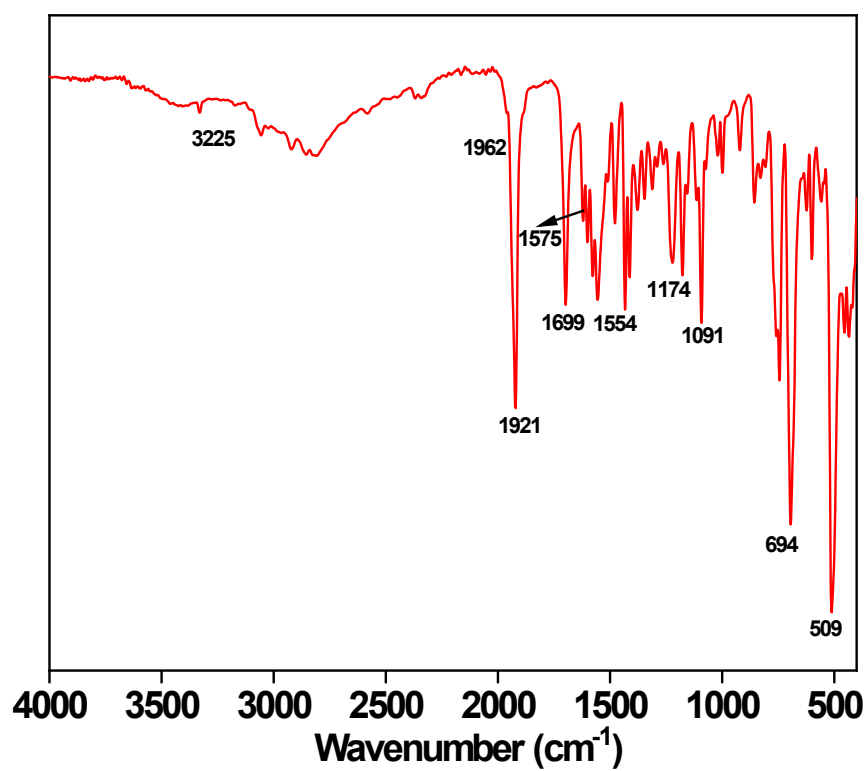

Figure S6. FTIR spectrum of complex 2.

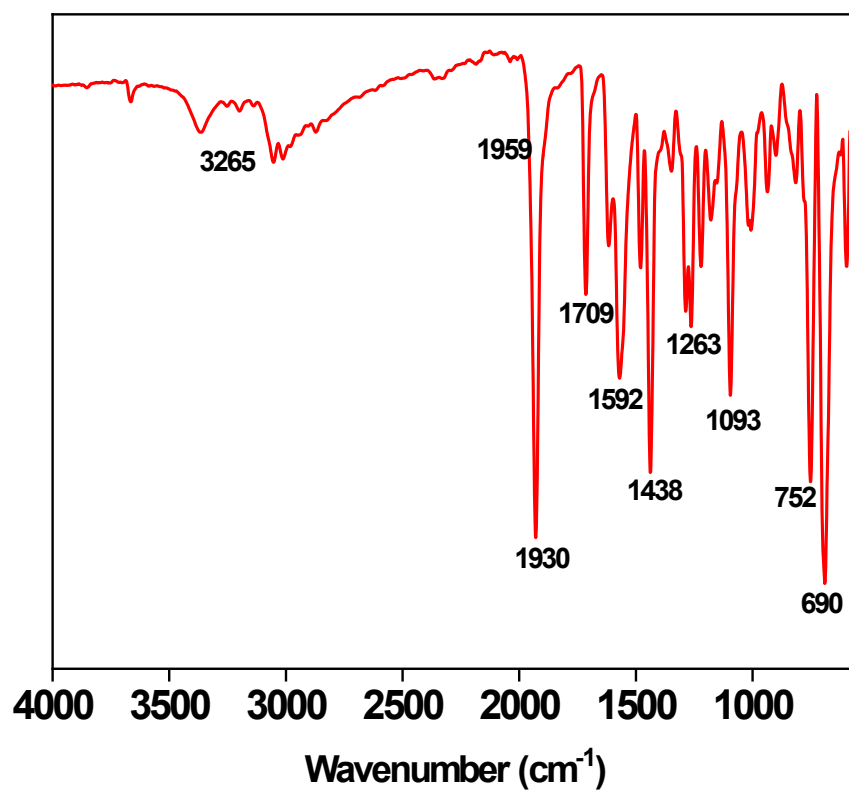

Figure S7. FTIR spectrum of complex 3.

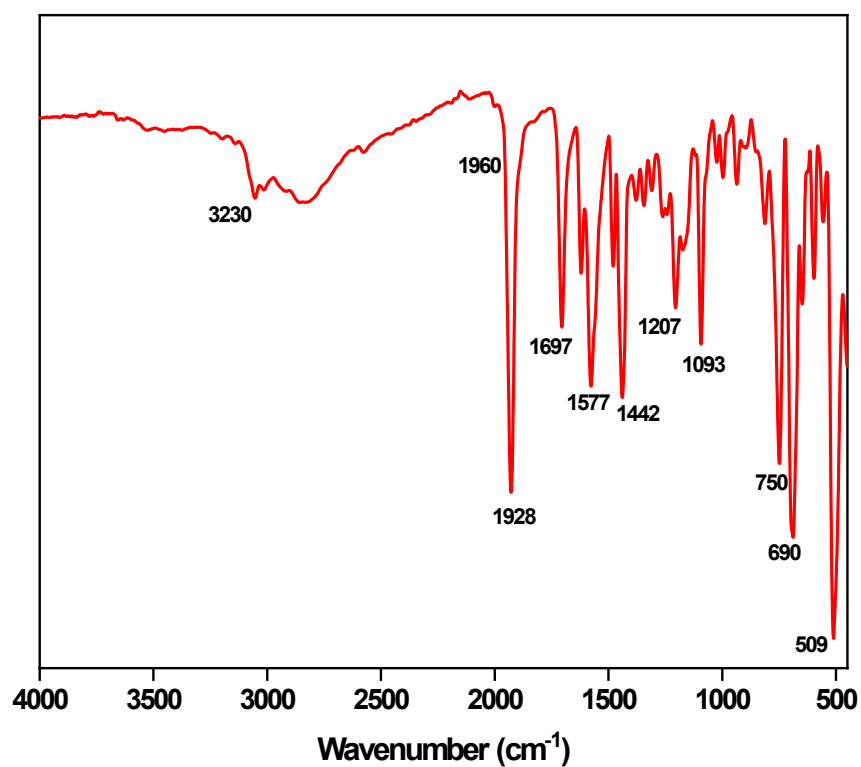

Figure S8. FTIR spectrum of complex 4.

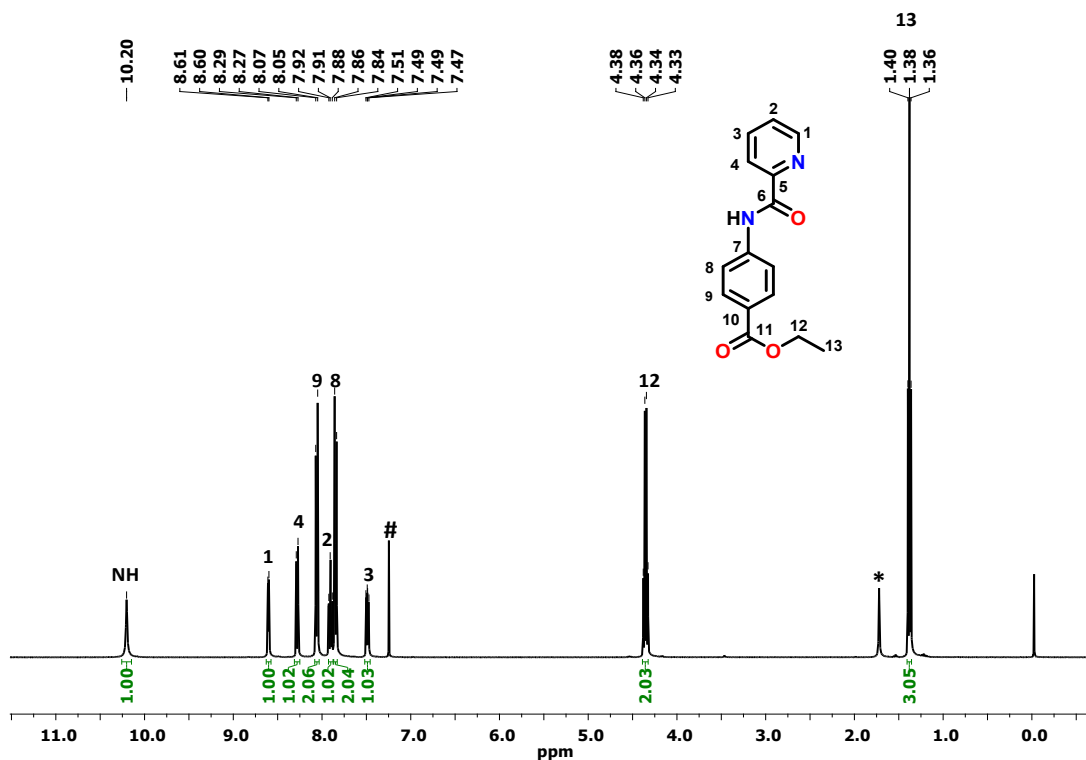

**Figure S9.**  $^1\text{H}$  NMR spectrum of ligand HL1 in  $\text{CDCl}_3$ . # and \* represent  $\text{CDCl}_3$  and residual solvent/  $\text{H}_2\text{O}$  peak, respectively.

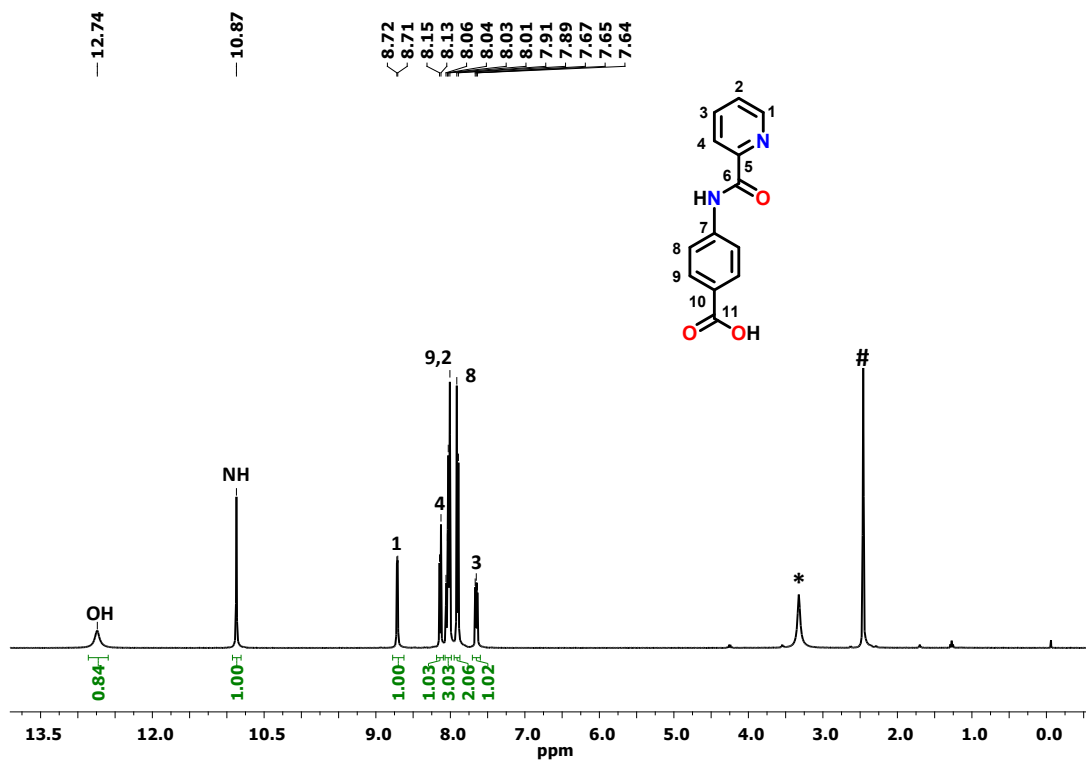

**Figure S10.**  $^1\text{H}$  NMR spectrum of ligand HL2 in  $\text{DMSO-}d_6$ . # and \* represent  $\text{DMSO-}d_6$  and residual solvent/  $\text{H}_2\text{O}$  peak, respectively.

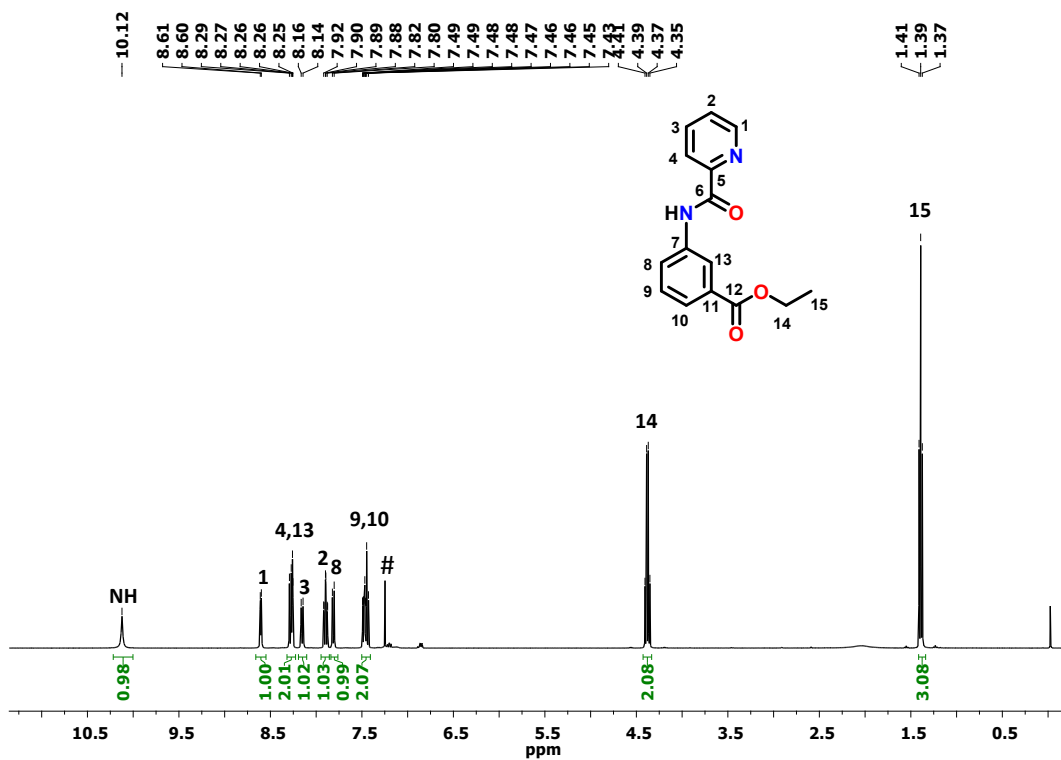

Figure S11.  $^1\text{H}$  NMR spectrum of ligand HL3 in  $\text{CDCl}_3$ . # Represents  $\text{CDCl}_3$ .

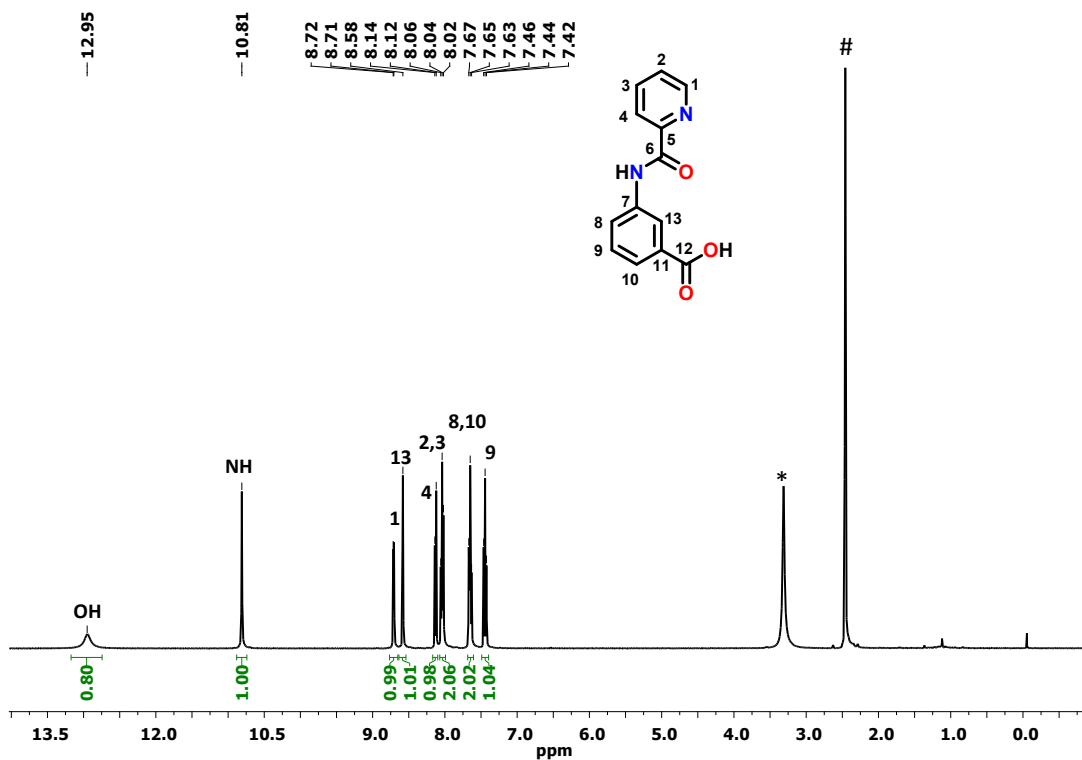

Figure S12.  $^1\text{H}$  NMR spectrum of ligand HL4 in  $\text{DMSO-}d_6$ . # and \* represent  $\text{DMSO-}d_6$  and residual solvent/  $\text{H}_2\text{O}$  peak, respectively.

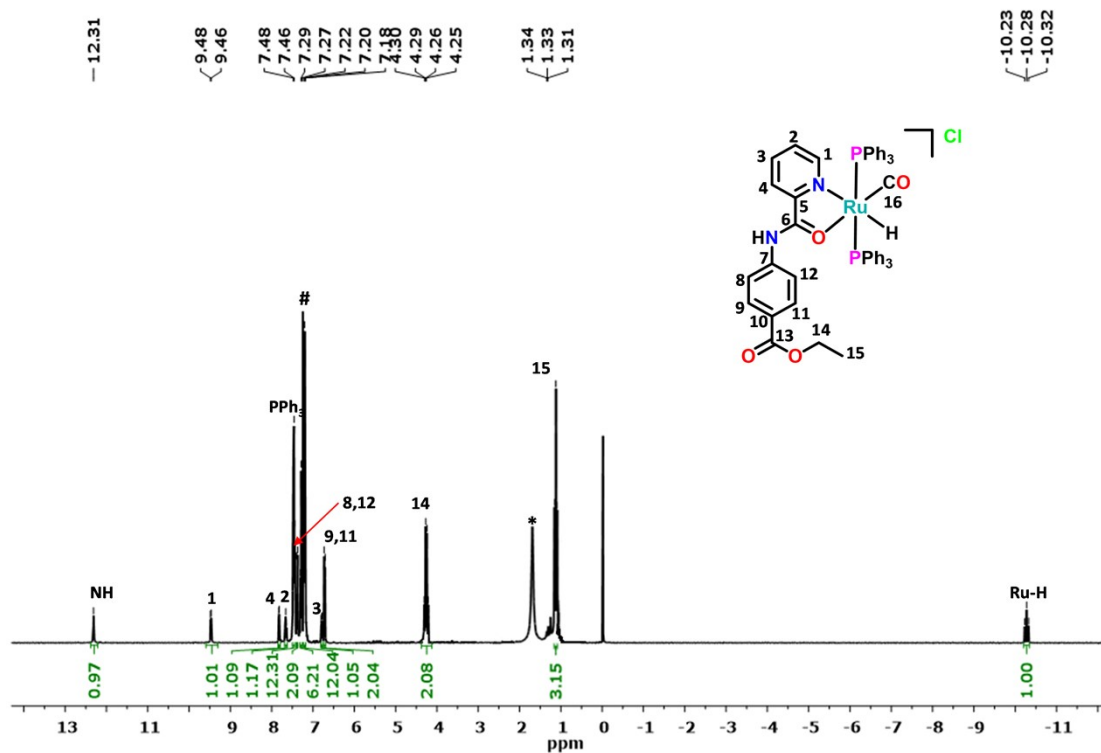

**Figure S13.** <sup>1</sup>H NMR spectrum of complex 1 in CDCl<sub>3</sub>. # and \* represent CDCl<sub>3</sub> and residual solvent/ H<sub>2</sub>O peak, respectively.

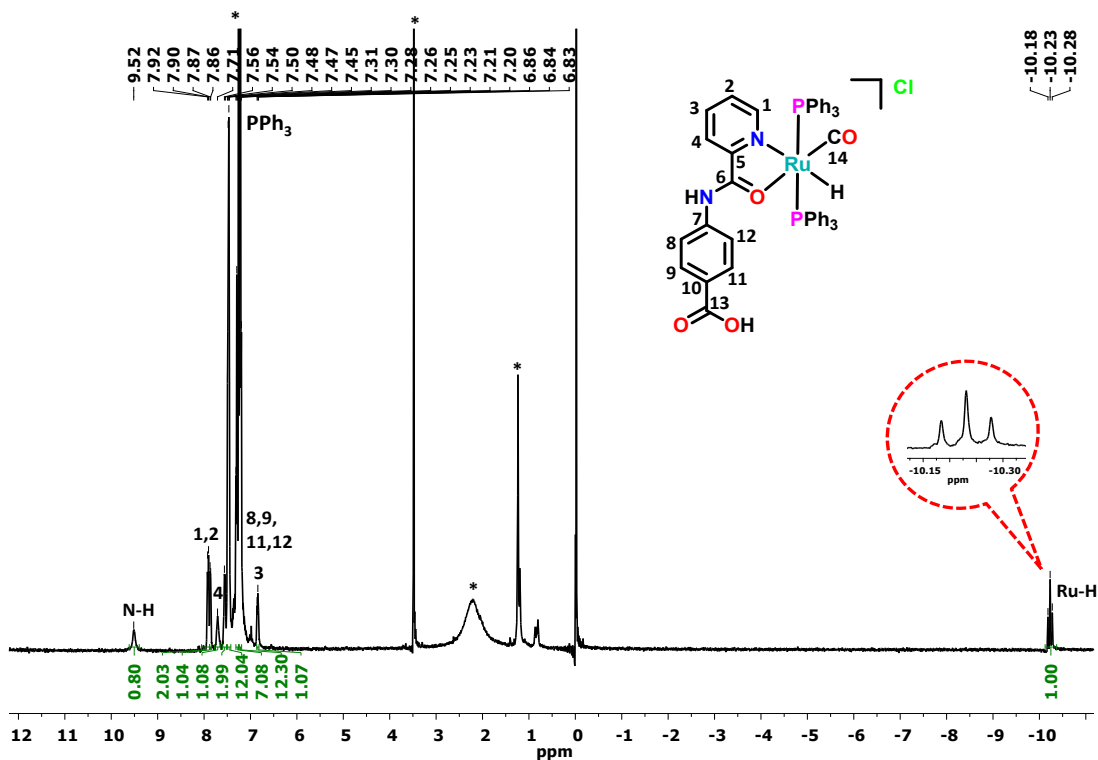

**Figure S14.** <sup>1</sup>H NMR spectrum of complex 2 in CDCl<sub>3</sub>. \* represents CDCl<sub>3</sub> /residual solvent/ H<sub>2</sub>O peak.



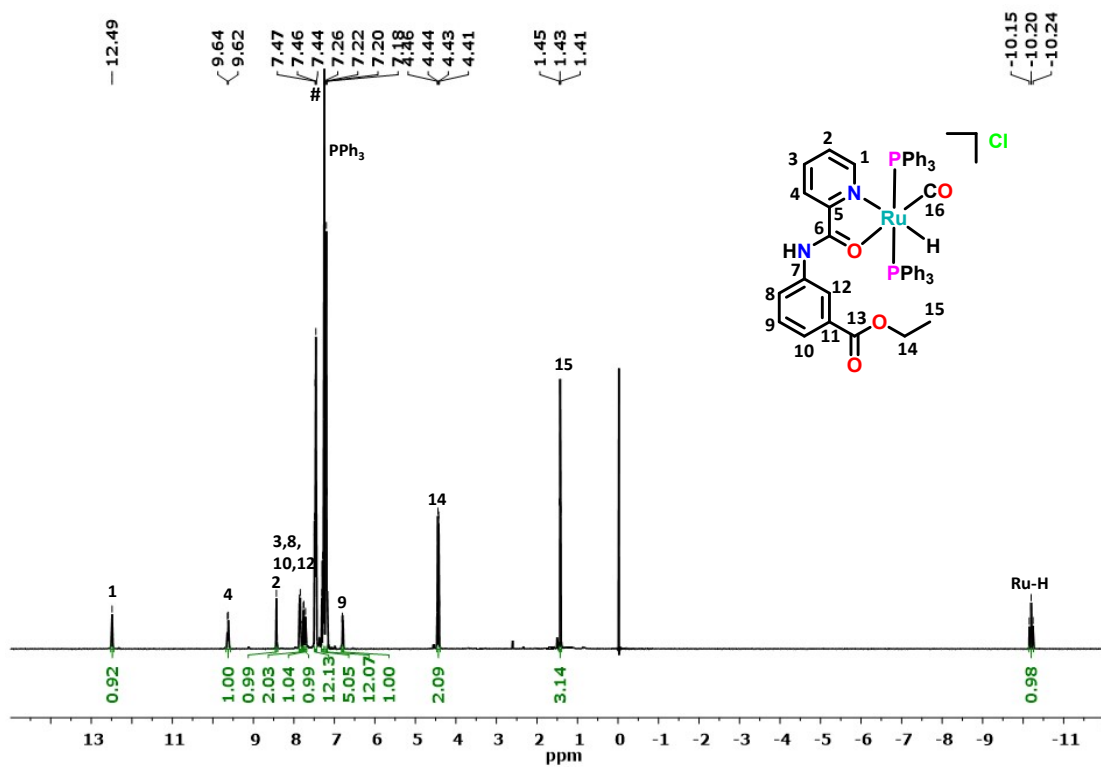

**Figure S15.**  $^1\text{H}$  NMR spectrum of complex **3** in  $\text{CDCl}_3$ . # represents  $\text{CDCl}_3$ .

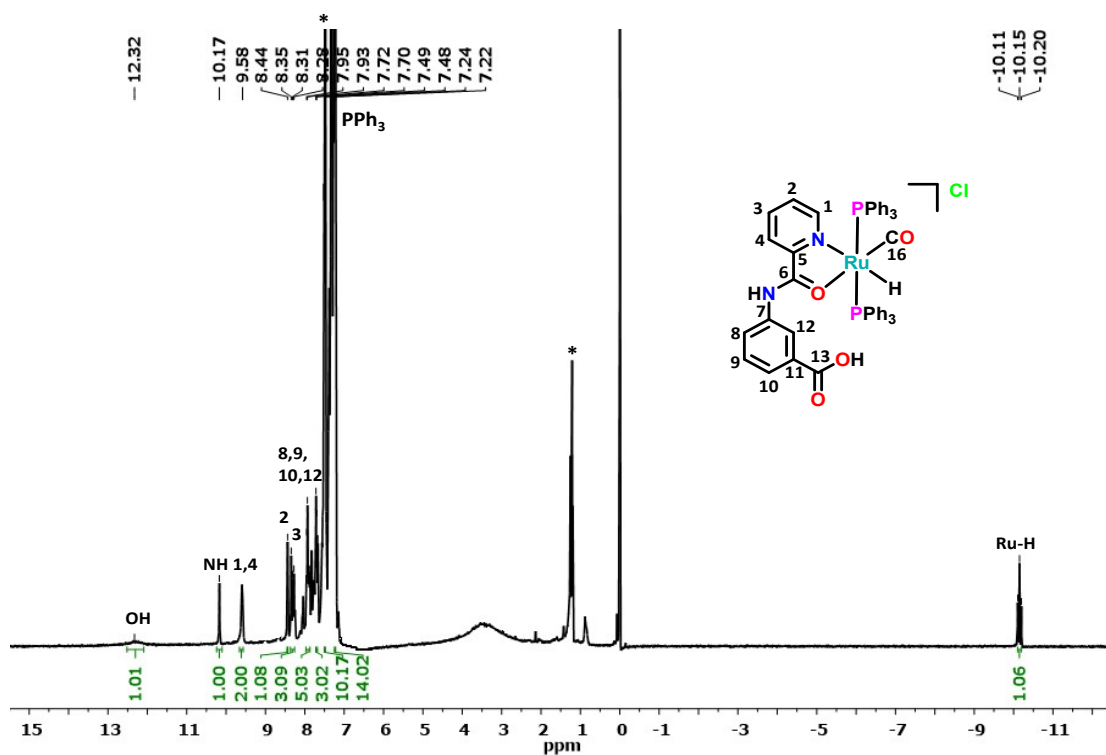

**Figure S16.**  $^1\text{H}$  NMR spectrum of complex **4** in  $\text{CDCl}_3$ . \* represents  $\text{CDCl}_3$  /residual solvent/  $\text{H}_2\text{O}$  peak.

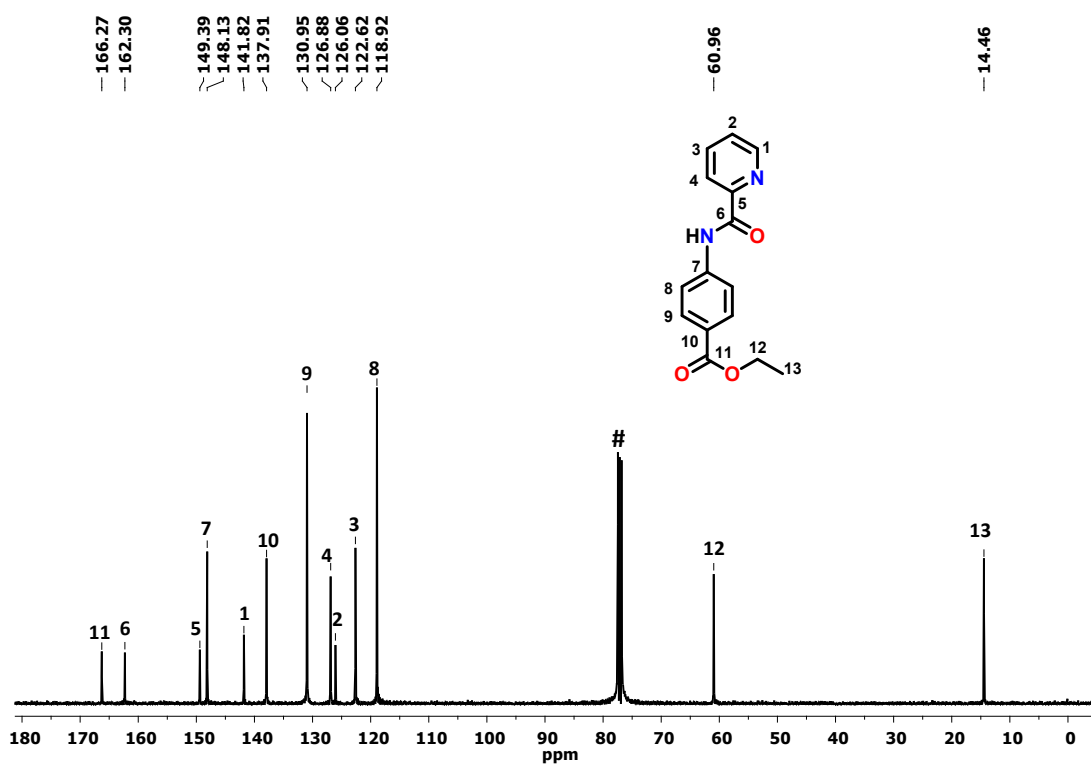

Figure S17. <sup>13</sup>C NMR spectrum of ligand HL1 in CDCl<sub>3</sub>. # Represent CDCl<sub>3</sub>.

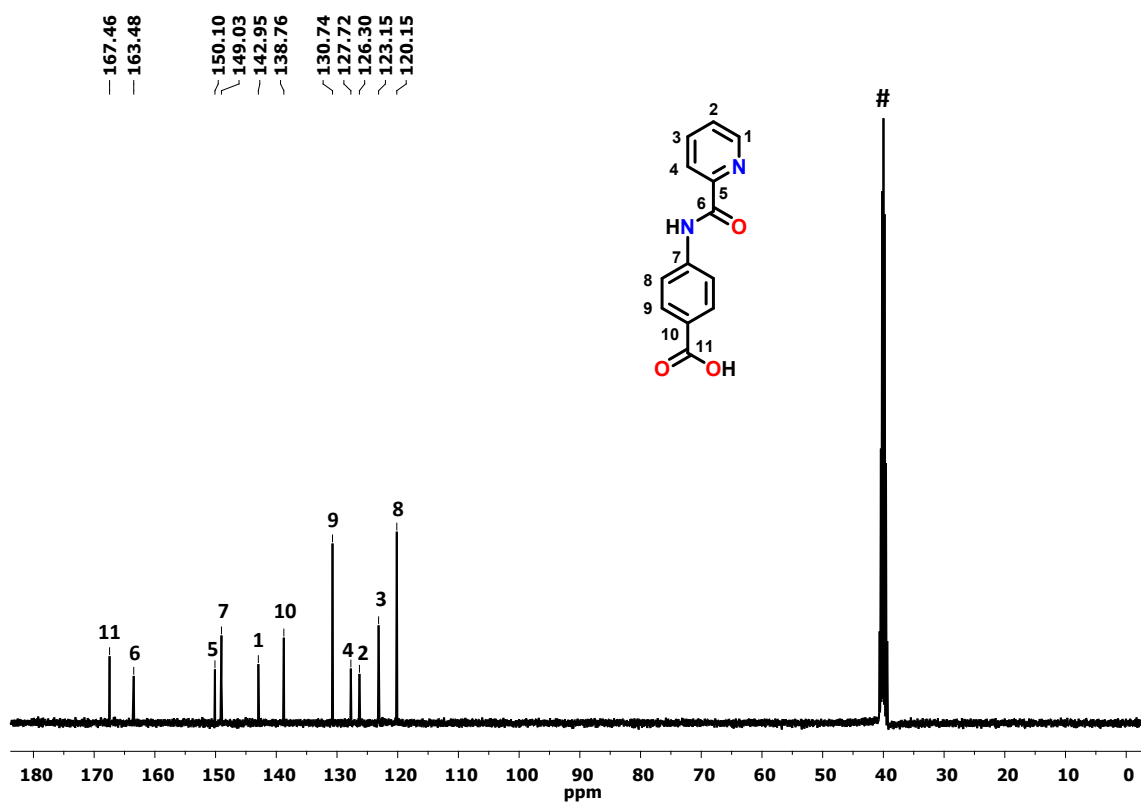

Figure S18. <sup>13</sup>C NMR spectrum of ligand HL2 in DMSO-*d*<sub>6</sub>. # Represent DMSO-*d*<sub>6</sub>.

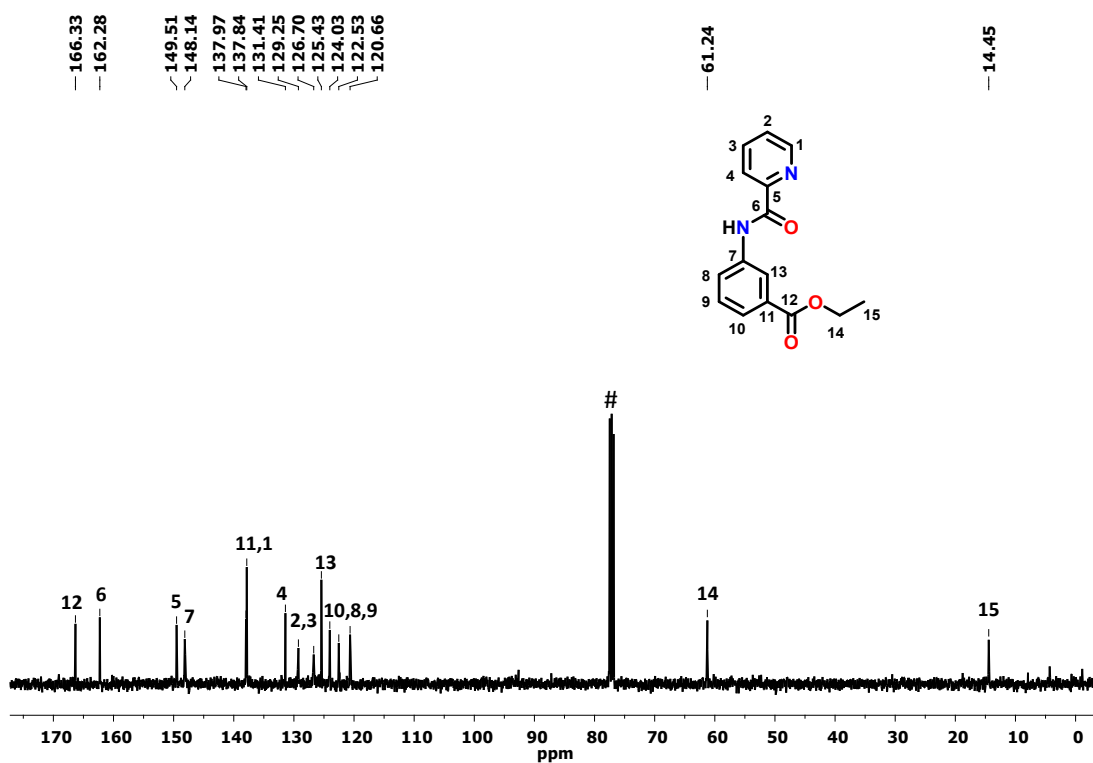

Figure S19. <sup>13</sup>C NMR spectrum of ligand HL3 in CDCl<sub>3</sub>. # Represents CDCl<sub>3</sub>.

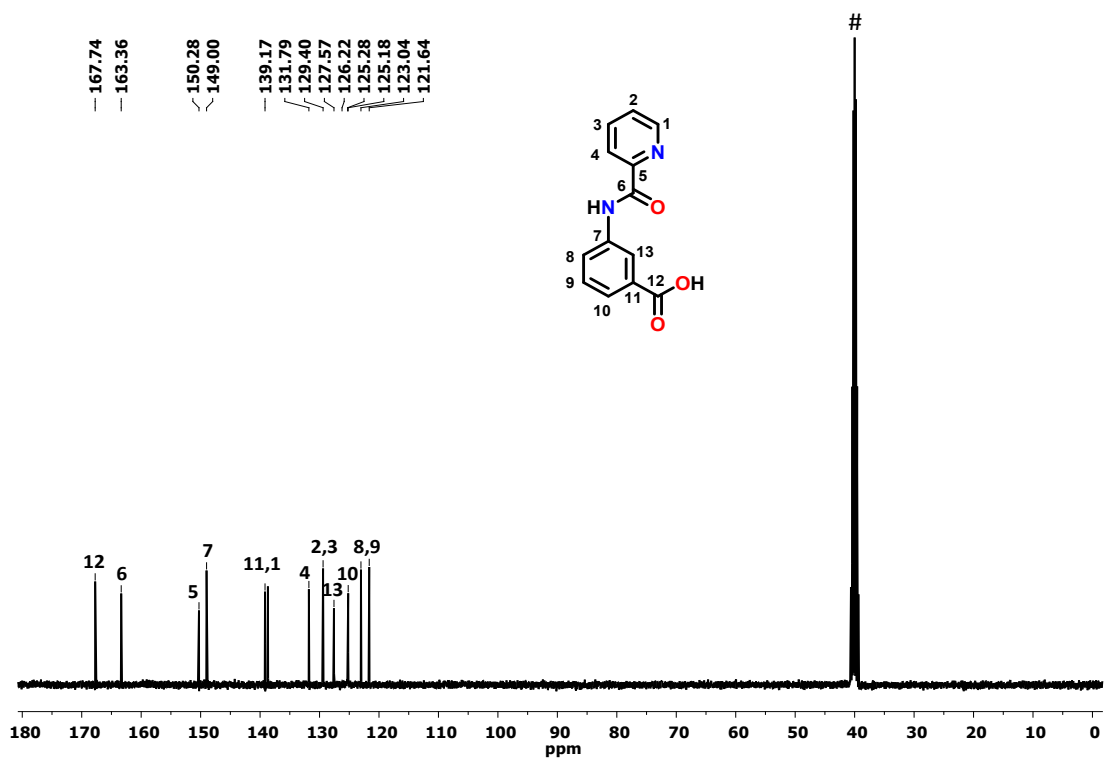

Figure S20. <sup>13</sup>C NMR spectrum of ligand HL4 in DMSO-*d*<sub>6</sub>. # Represents DMSO-*d*<sub>6</sub>.

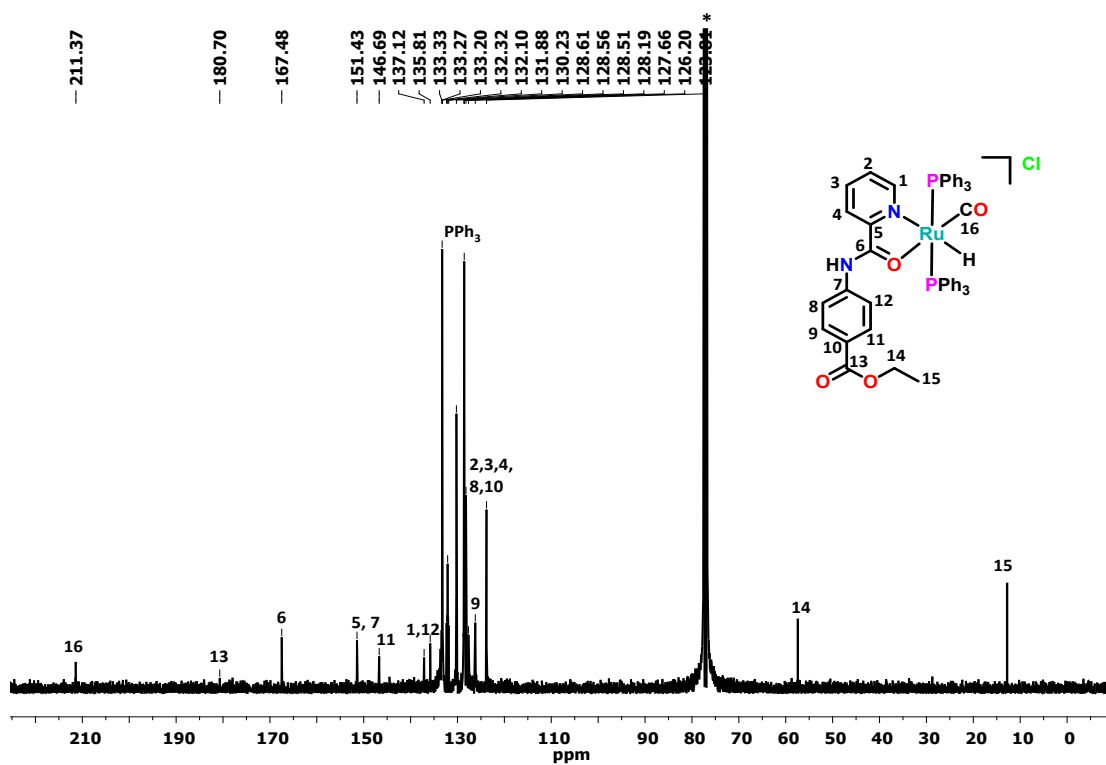

Figure S21.  $^{13}\text{C}$  NMR spectrum of complex **1** in  $\text{CDCl}_3$ . \* represents  $\text{CDCl}_3$ .

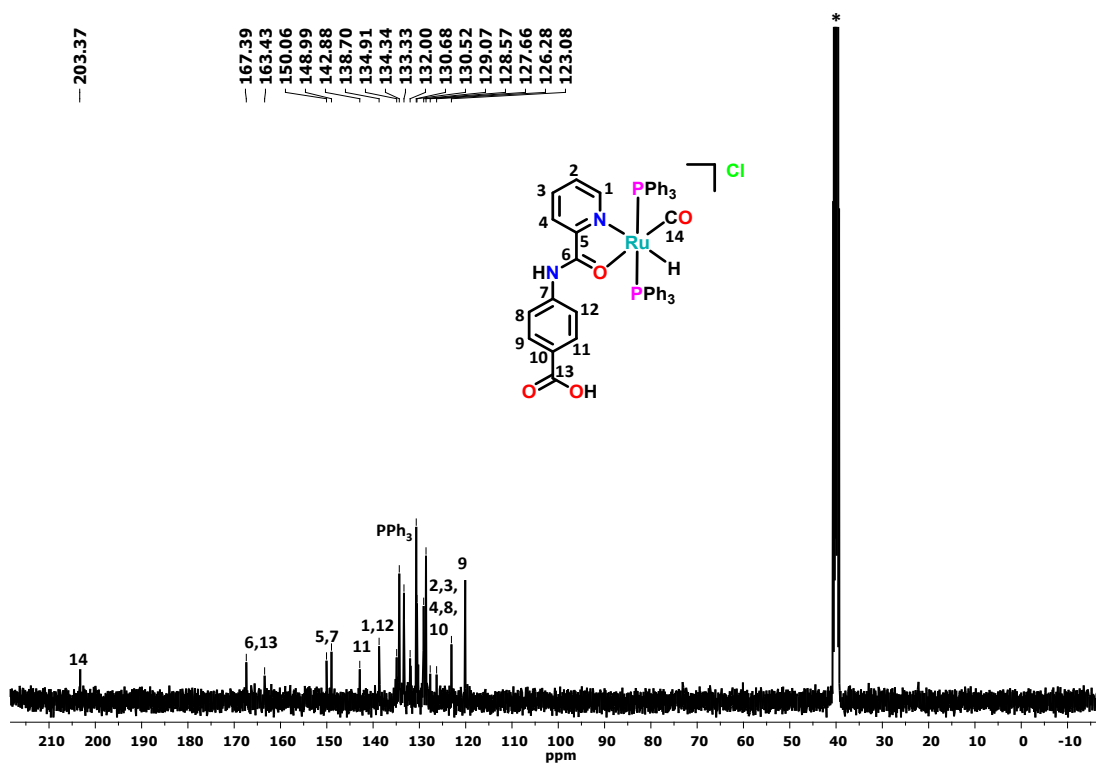

Figure S22.  $^{13}\text{C}$  NMR spectrum of complex **2** in  $\text{DMSO-}d_6$ . \* represents  $\text{DMSO-}d_6$ .

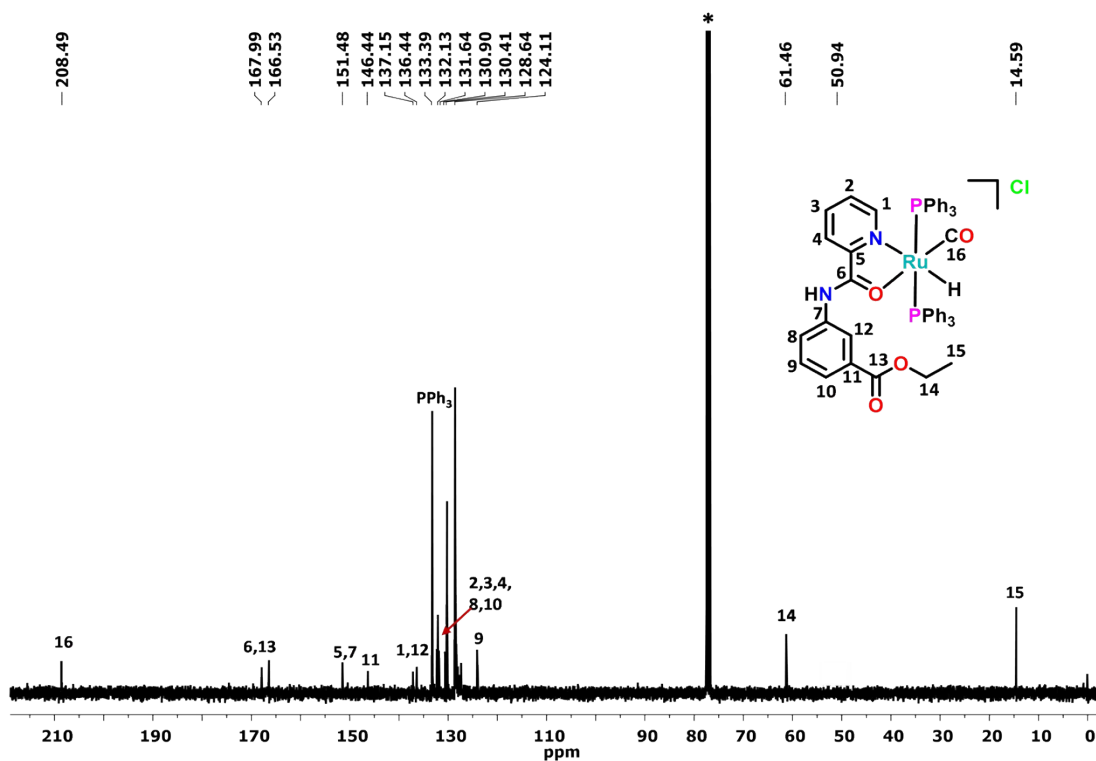

**Figure S23.** <sup>13</sup>C NMR spectrum of complex 3 in CDCl<sub>3</sub>. \* represents CDCl<sub>3</sub>.

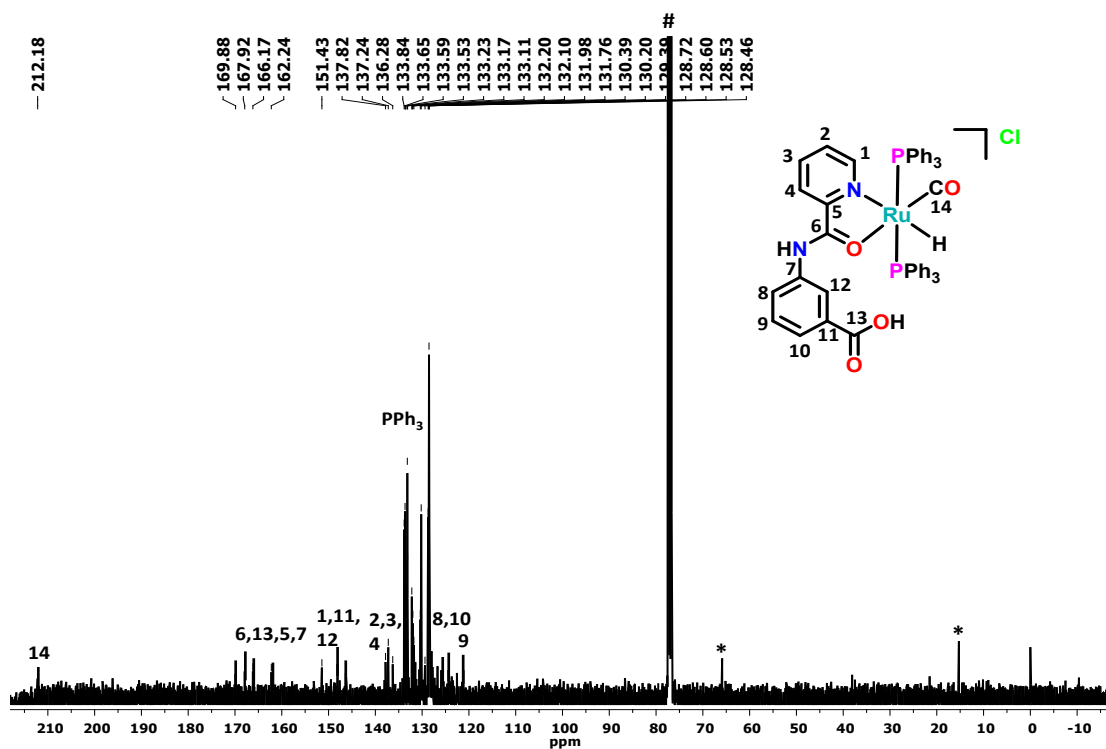

**Figure S24.** <sup>13</sup>C NMR spectrum of complex 4 in CDCl<sub>3</sub>. # and \* represent CDCl<sub>3</sub> and residual solvent, respectively.

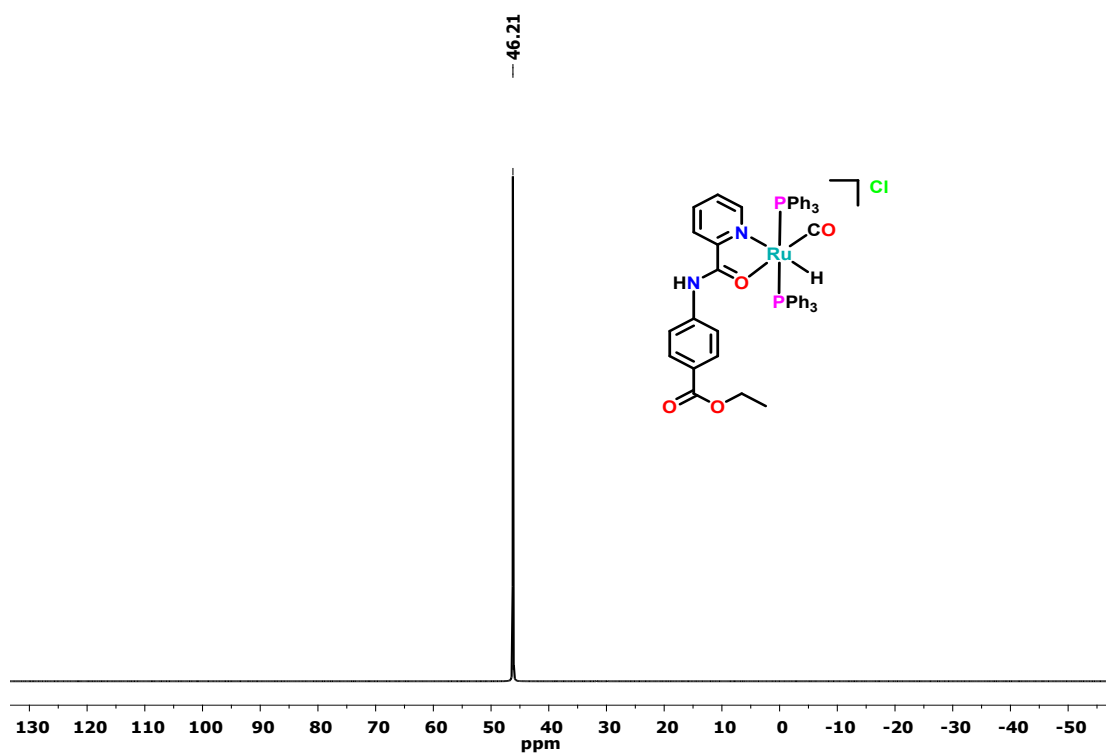

Figure S25. <sup>31</sup>P NMR spectrum of complex 1 in CDCl<sub>3</sub>.

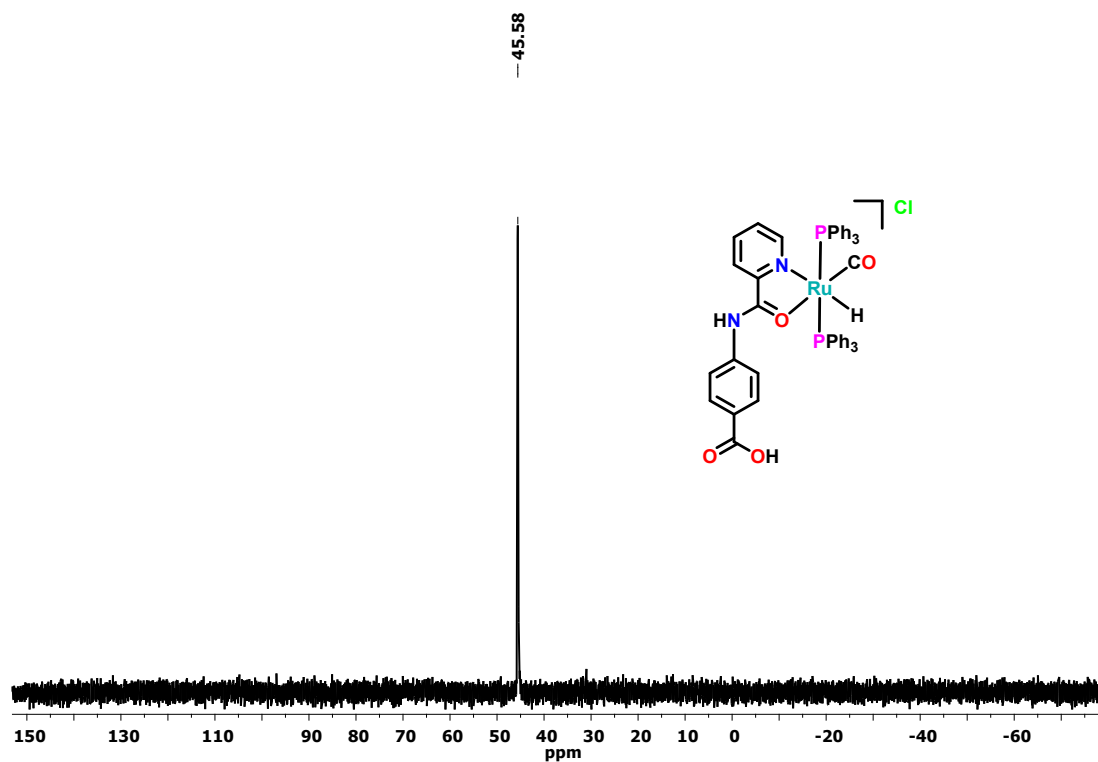

Figure S26. <sup>31</sup>P NMR spectrum of complex 2 in DMSO-*d*<sub>6</sub>.

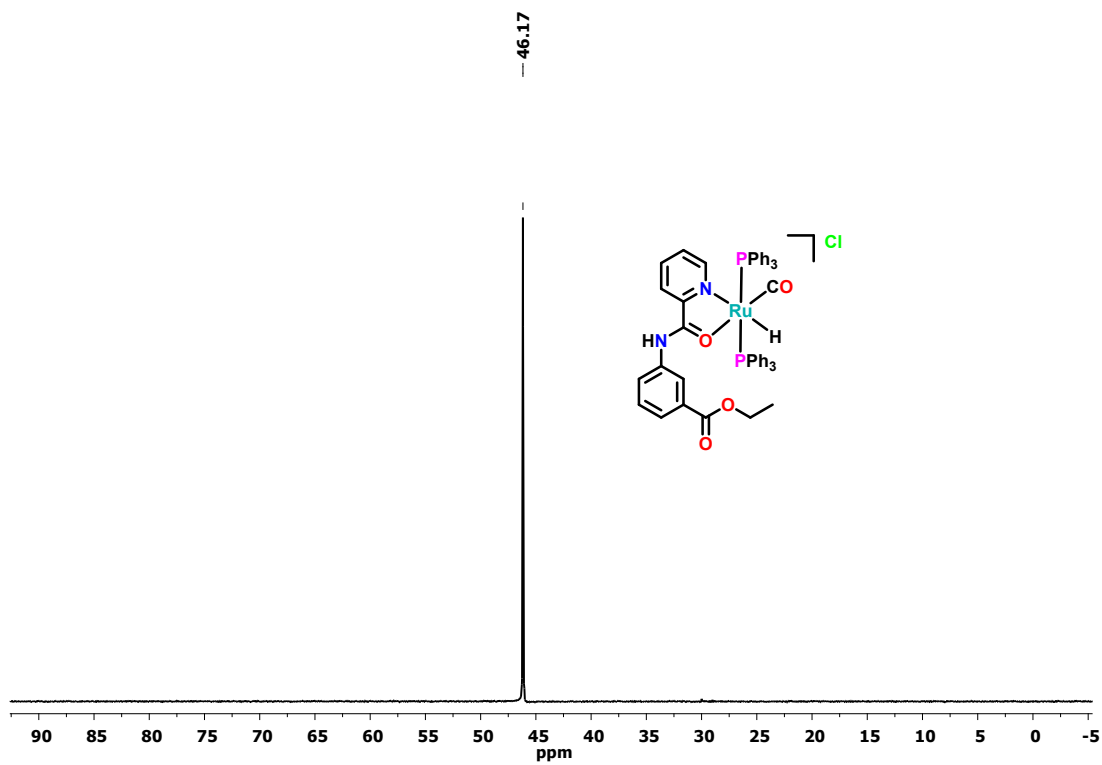

**Figure S27.**  $^{31}\text{P}$  NMR spectrum of complex **3** in  $\text{CDCl}_3$ .

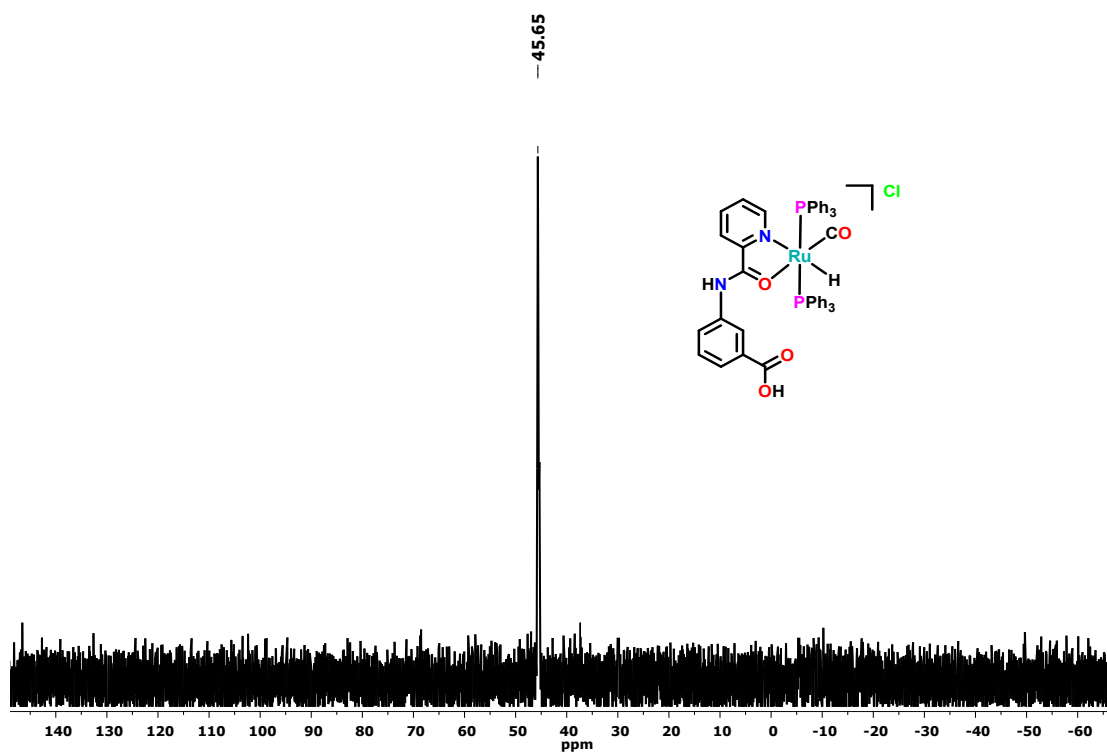

**Figure S28.**  $^{31}\text{P}$  NMR spectrum of complex **4** in  $\text{CDCl}_3$ .

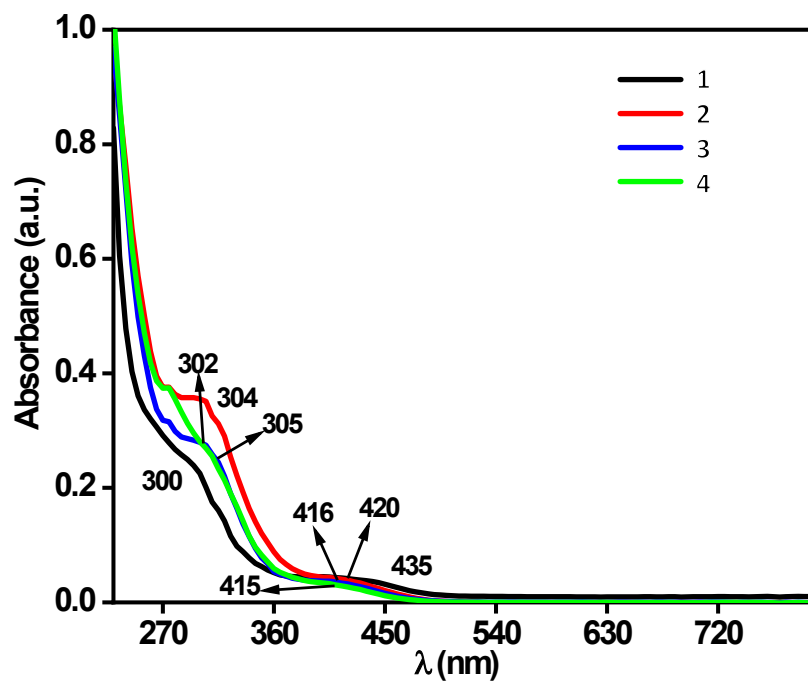

Figure S29. UV-Vis spectra of complexes 1-4 recorded in MeOH.

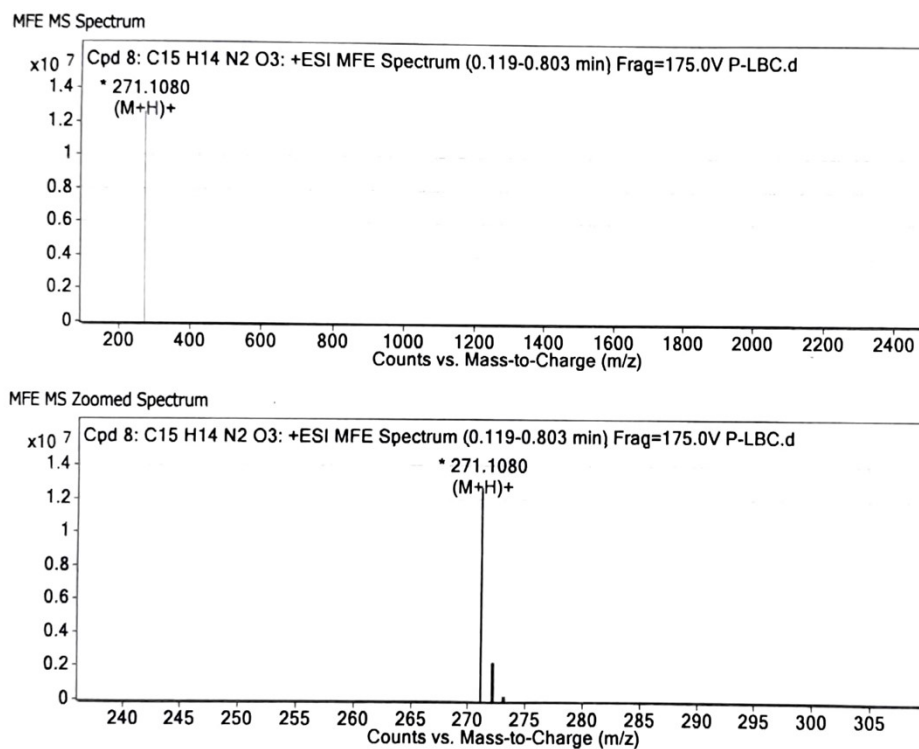

Figure S30. ESI<sup>+</sup>-MS spectrum of ligand HL1 in MeOH.



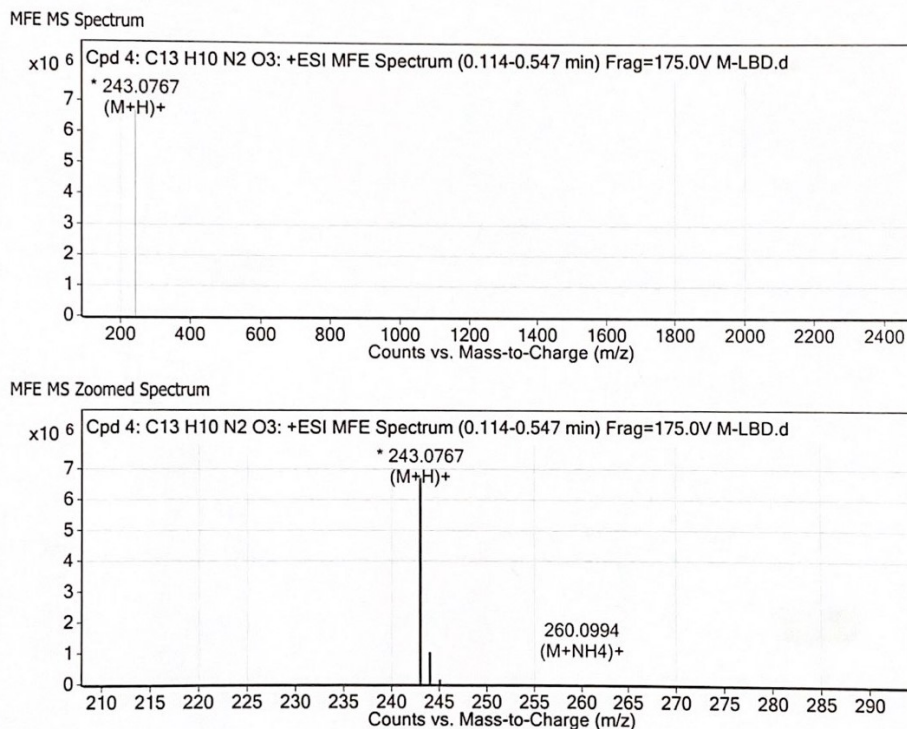

**Figure S31.** ESI<sup>+</sup>-MS spectrum of ligand HL2 in MeOH.

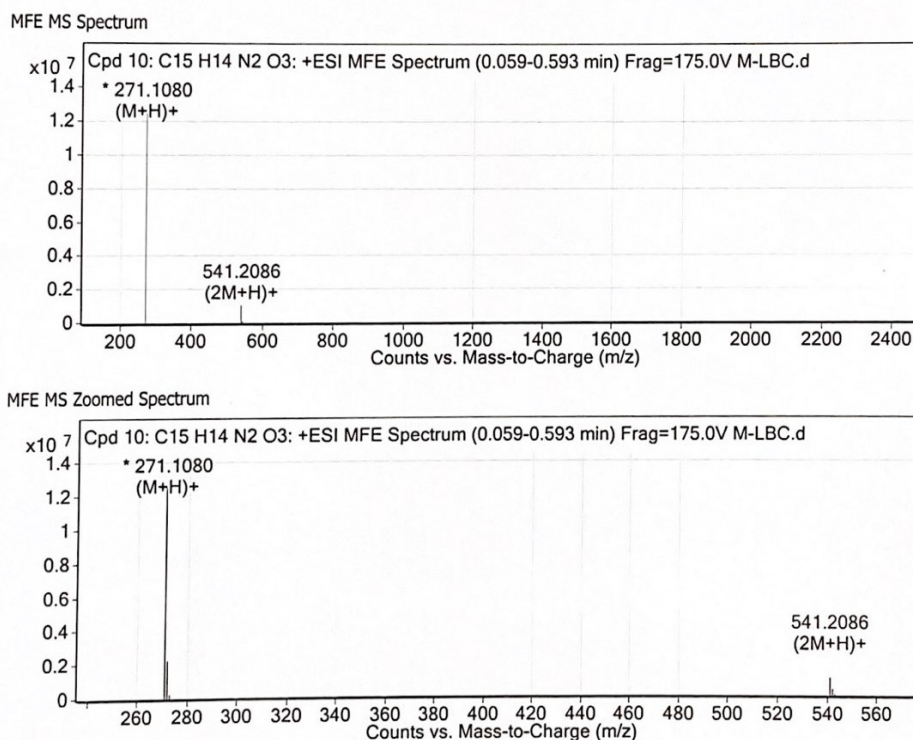

**Figure S32.** ESI<sup>+</sup>-MS spectrum of ligand HL3 in MeOH.

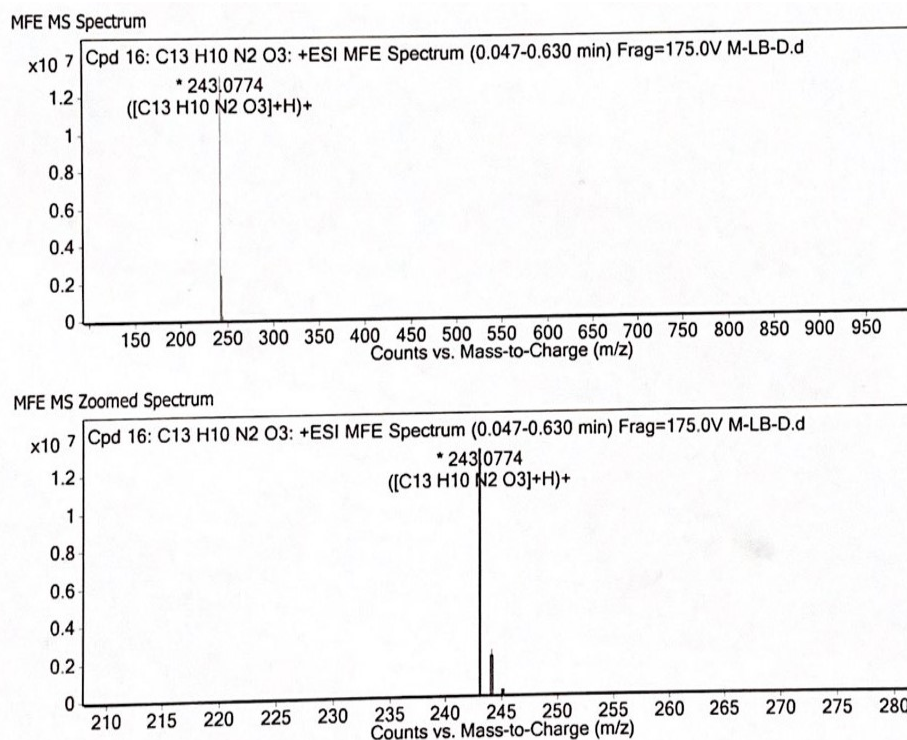

**Figure S33.** ESI<sup>+</sup>-MS spectrum of ligand HL4 in MeOH.

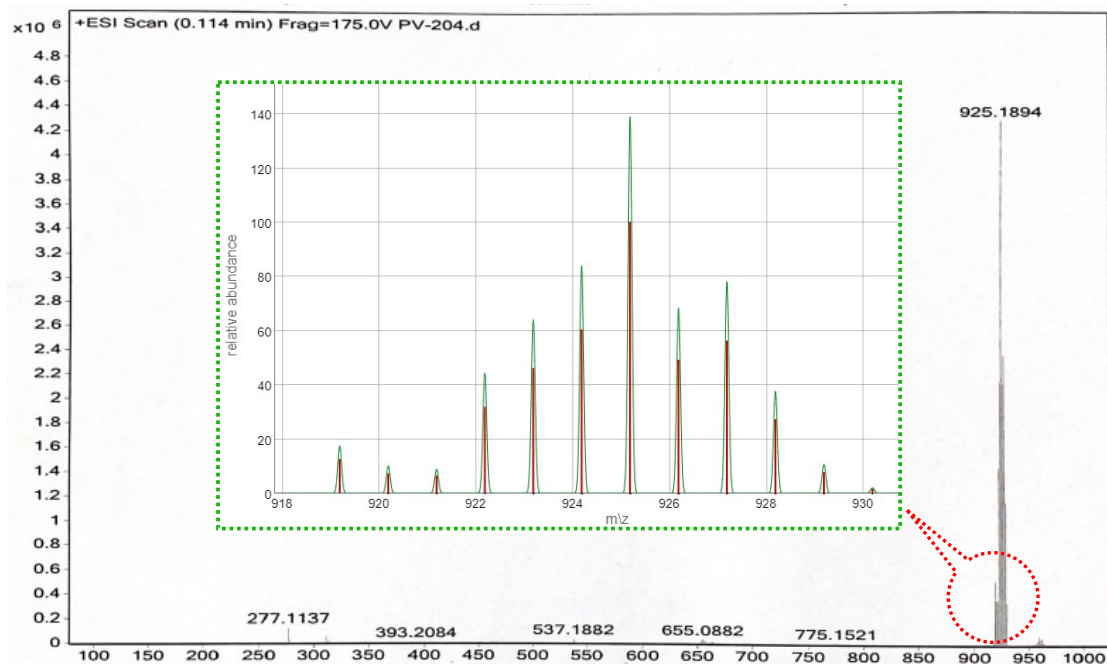

**Figure S34.** ESI<sup>+</sup>-MS spectrum of complex **1** in MeOH. Inset: Experimental (green) and simulated (red) patterns for the molecular ion peak at  $m/z = 925.1894$   $[M-Cl]^+$  for complex **1**.

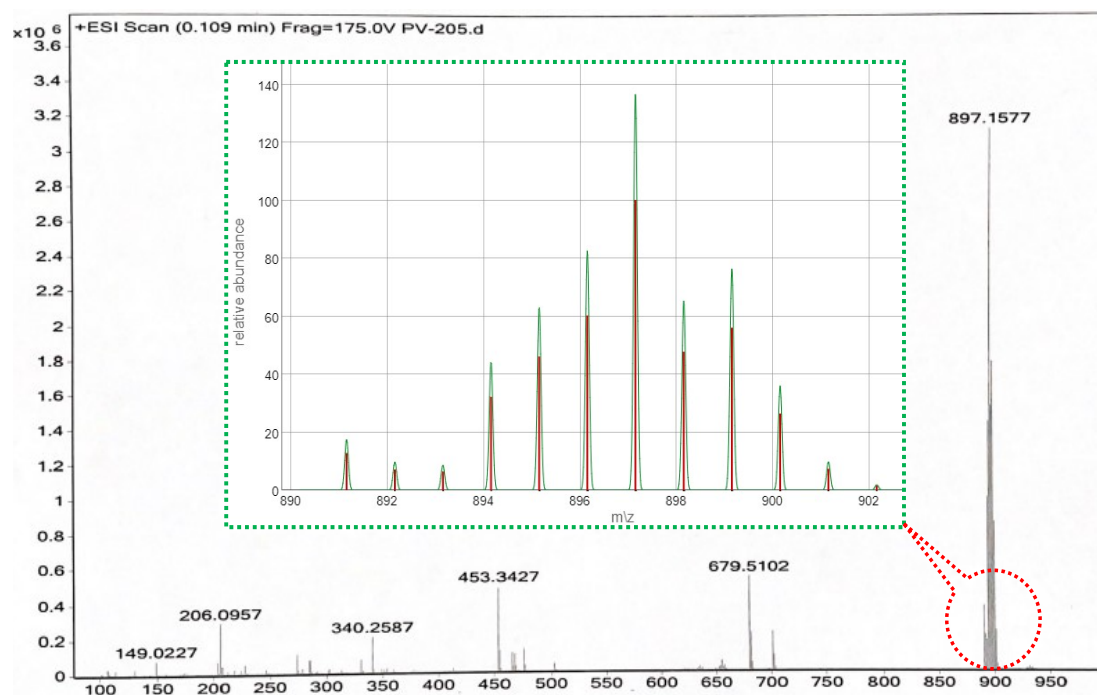

**Figure S35.** ESI<sup>+</sup>-MS spectrum of complex **2** in MeOH. Inset: Experimental (green) and simulated (red) patterns for the molecular ion peak at  $m/z = 897.1577$   $[M-Cl]^+$  for complex **2**.

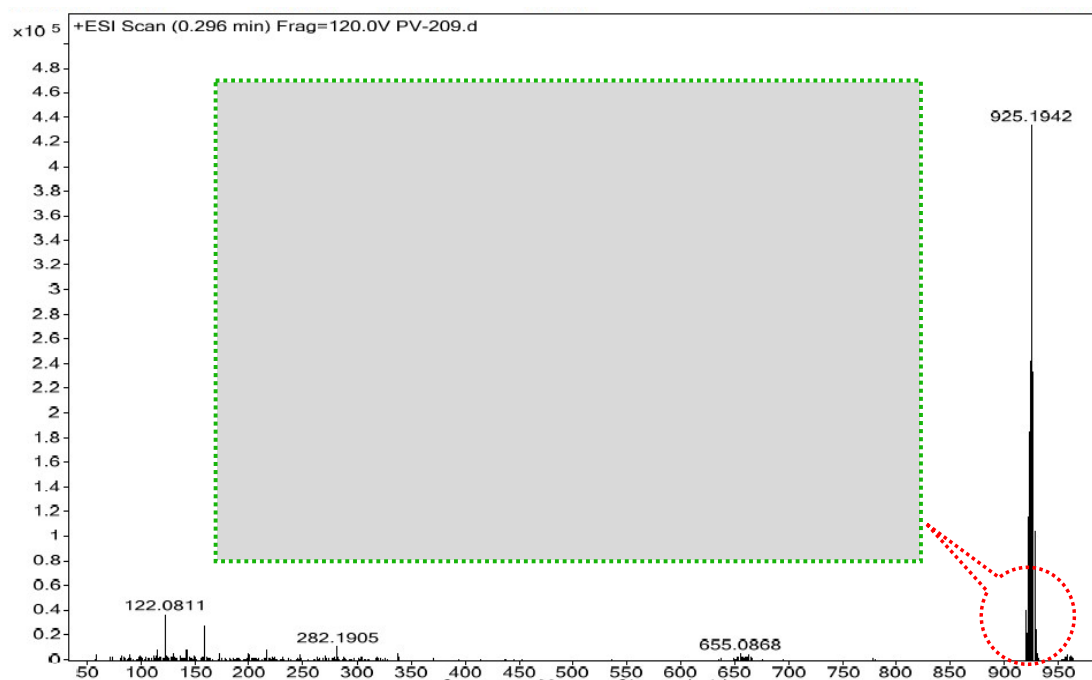

**Figure S36.** ESI<sup>+</sup>-MS spectrum of complex **3** in MeOH. Inset: Experimental (green) and simulated (red) patterns for the molecular ion peak at  $m/z = 925.1942$   $[M-Cl]^+$  for complex **3**.

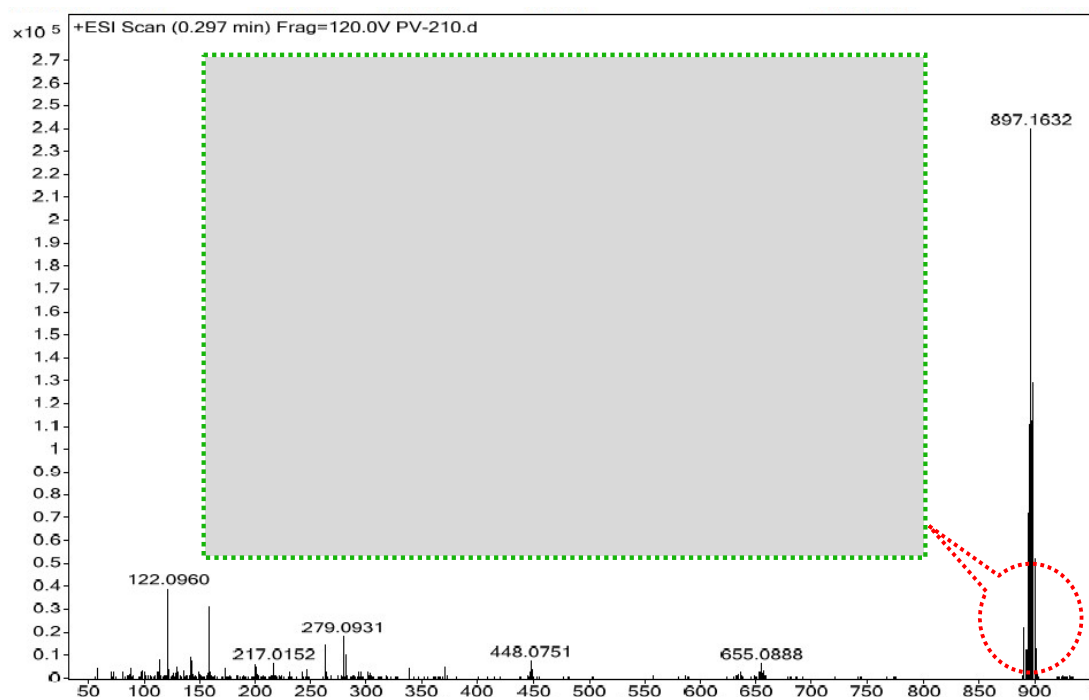

**Figure S37.** ESI<sup>+</sup>-MS spectrum of complex **4** in MeOH. Inset: Experimental (green) and simulated (red) patterns for the molecular ion peak at  $m/z = 897.1632$   $[M-Cl]^+$  for complex **4**.

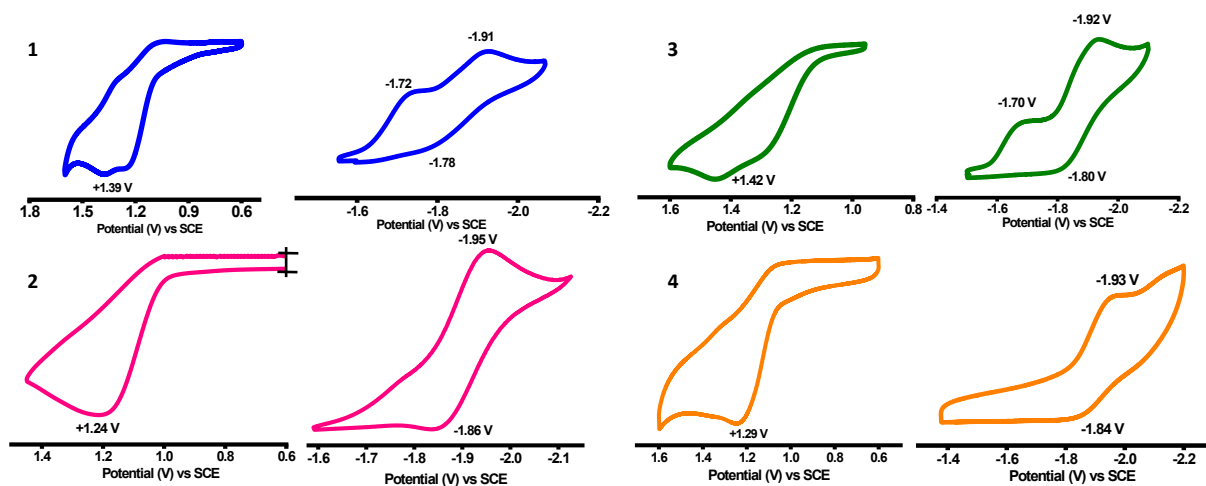

**Figure S38.** Cyclic voltammograms for complexes **1** – **4**. Conditions: solvent, DMF; complex, ca. 1 mM; supporting electrolyte, TBAP, ca. 100 mM; working electrode, glassy carbon; reference electrode, Ag/Ag<sup>+</sup>; auxiliary electrode, Pt wire; scan rate, 100 mV/s.

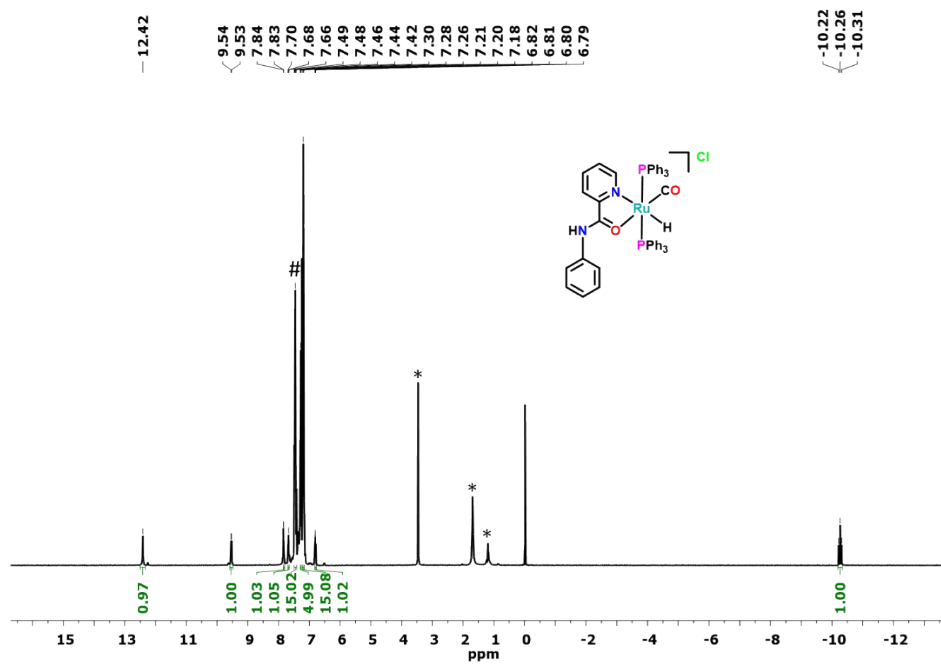

**Figure S39.**  $^1\text{H}$  NMR spectrum of complex **5** in  $\text{CDCl}_3$ . # and \* represent  $\text{CDCl}_3$  and residual solvent/  $\text{H}_2\text{O}$  peak, respectively.

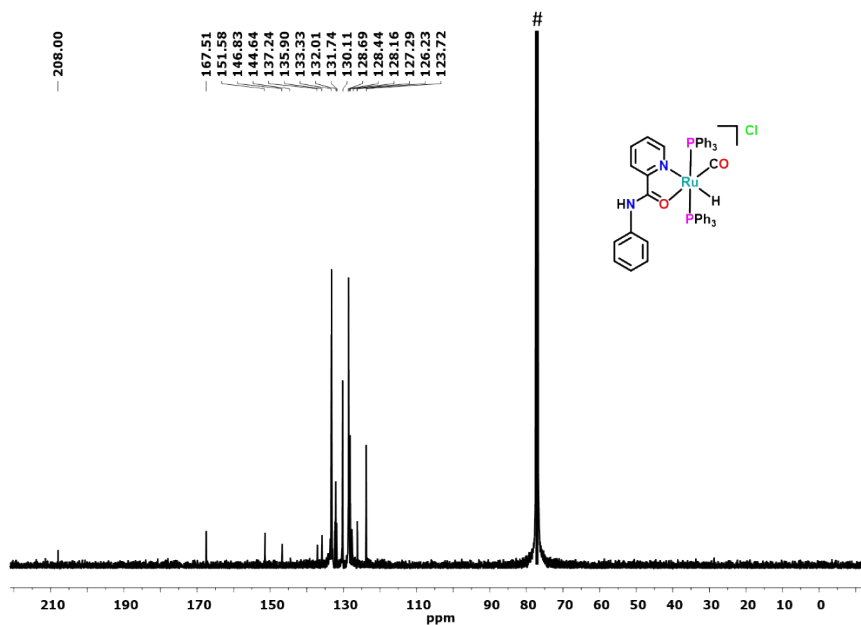

**Figure S40.**  $^{13}\text{C}$  NMR spectrum of complex **5** in  $\text{CDCl}_3$ . # represents  $\text{CDCl}_3$ .

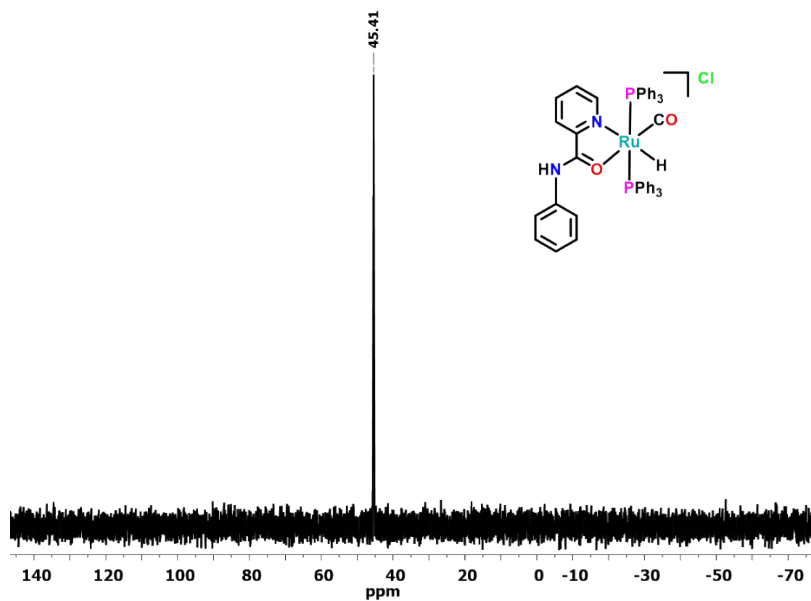

**Figure 41.**  $^{31}\text{P}$  NMR spectrum of complex **5** in  $\text{CDCl}_3$ .

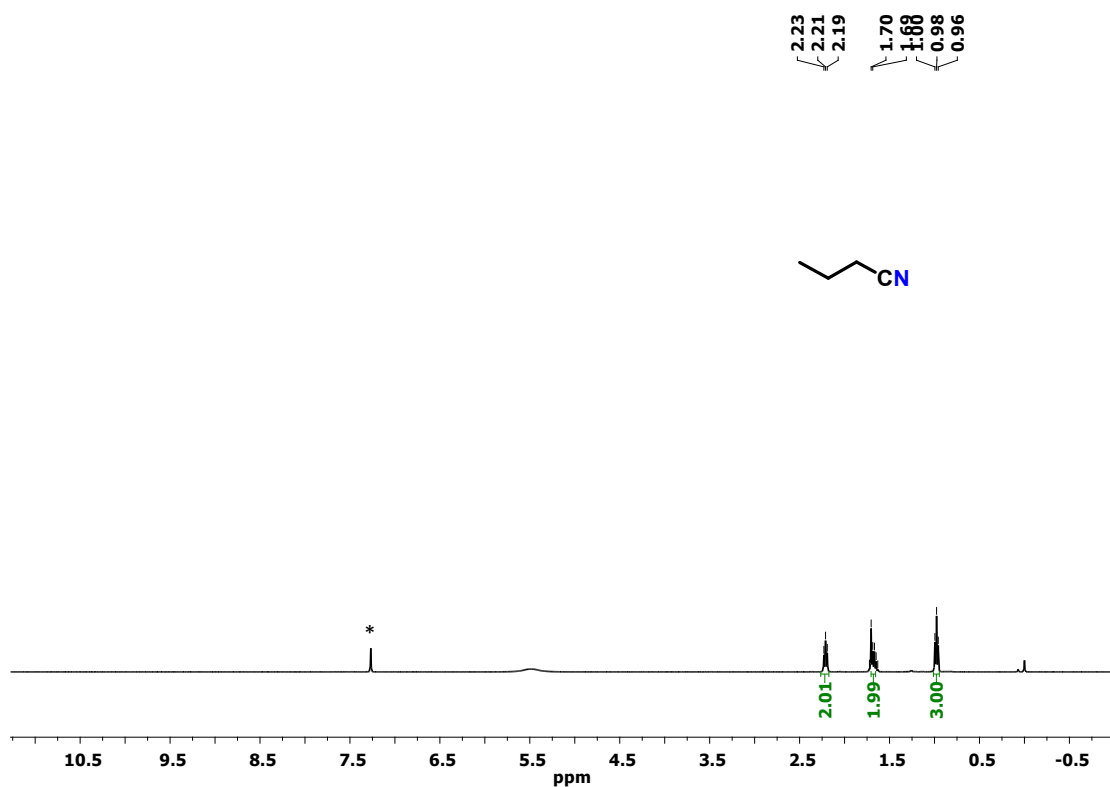

**Figure S42.**  $^1\text{H}$  NMR spectrum of butyronitrile (table 2, entry 1) in  $\text{CDCl}_3$ . \* represents  $\text{CDCl}_3$  peak.

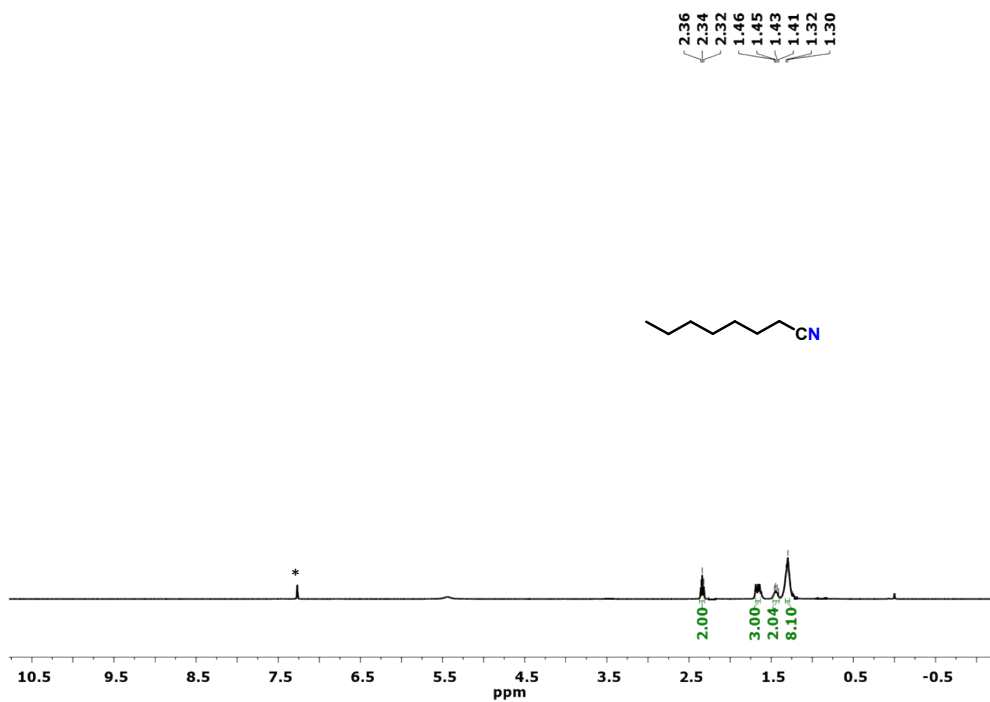

**Figure S43.**  $^1\text{H}$  NMR spectrum of octanenitrile (table 2, entry 2) in  $\text{CDCl}_3$ . \* represents  $\text{CDCl}_3$  peak.

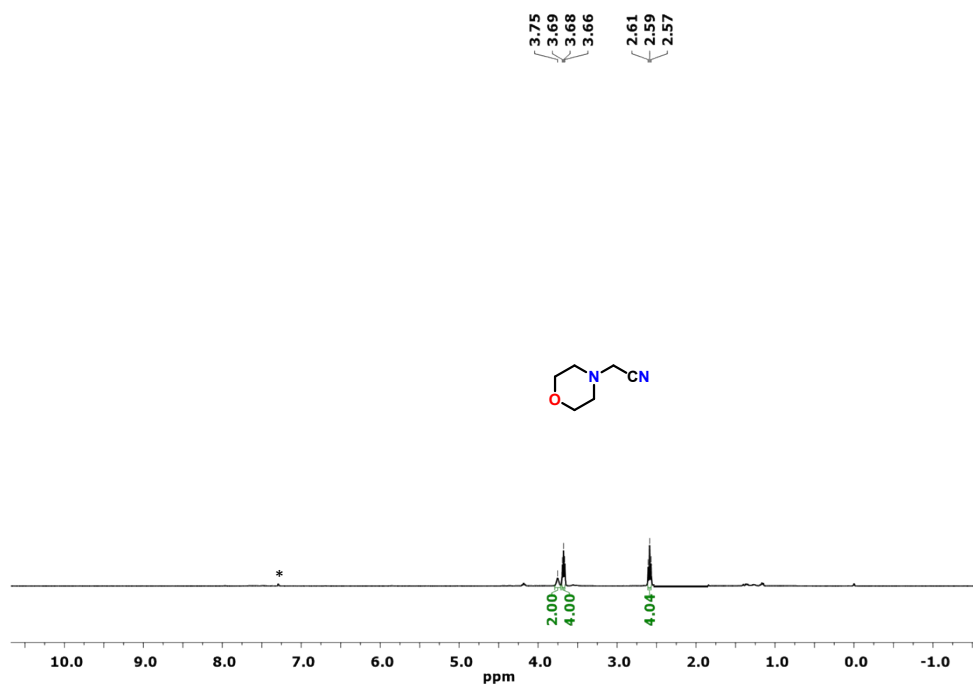

**Figure S44.**  $^1\text{H}$  NMR spectrum of 2-morpholinoacetonitrile (table 2, entry 3) in  $\text{CDCl}_3$ . \* represents  $\text{CDCl}_3$  peak.

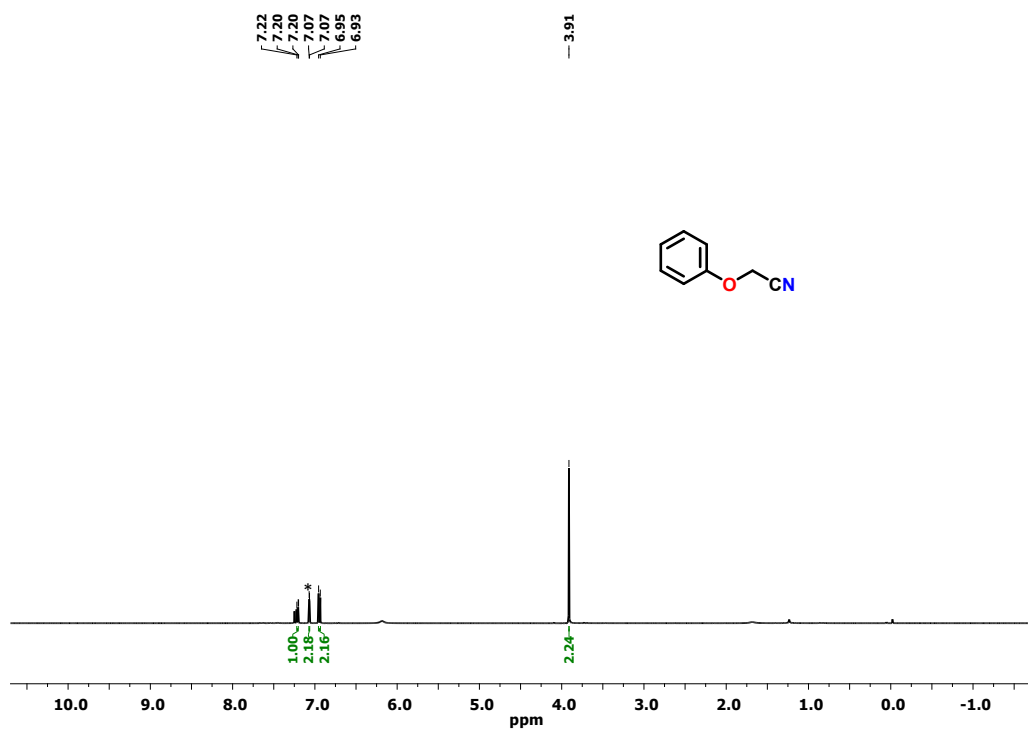

**Figure S45.**  $^1\text{H}$  NMR spectrum of 2-phenoxyacetonitrile (table 2, entry 4) in  $\text{CDCl}_3$ . \* represents  $\text{CDCl}_3$  peak.

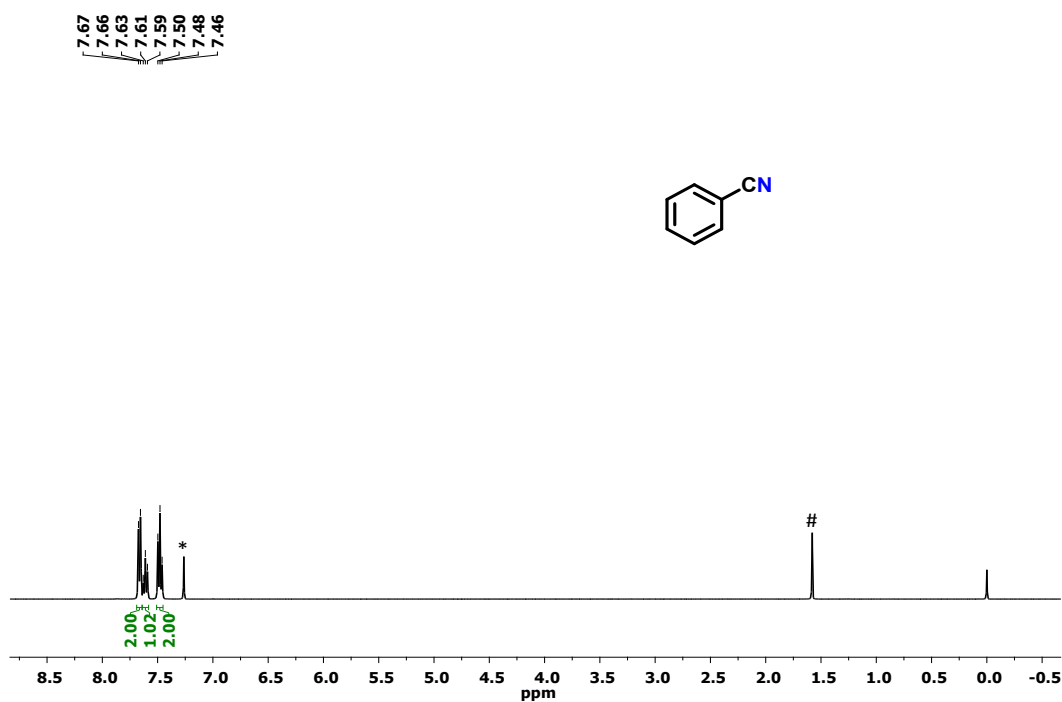

**Figure S46.**  $^1\text{H}$  NMR spectrum of benzonitrile (table 3, entry 1) in  $\text{CDCl}_3$ . \* and # represent  $\text{CDCl}_3$  and  $\text{H}_2\text{O}$  peaks, respectively.



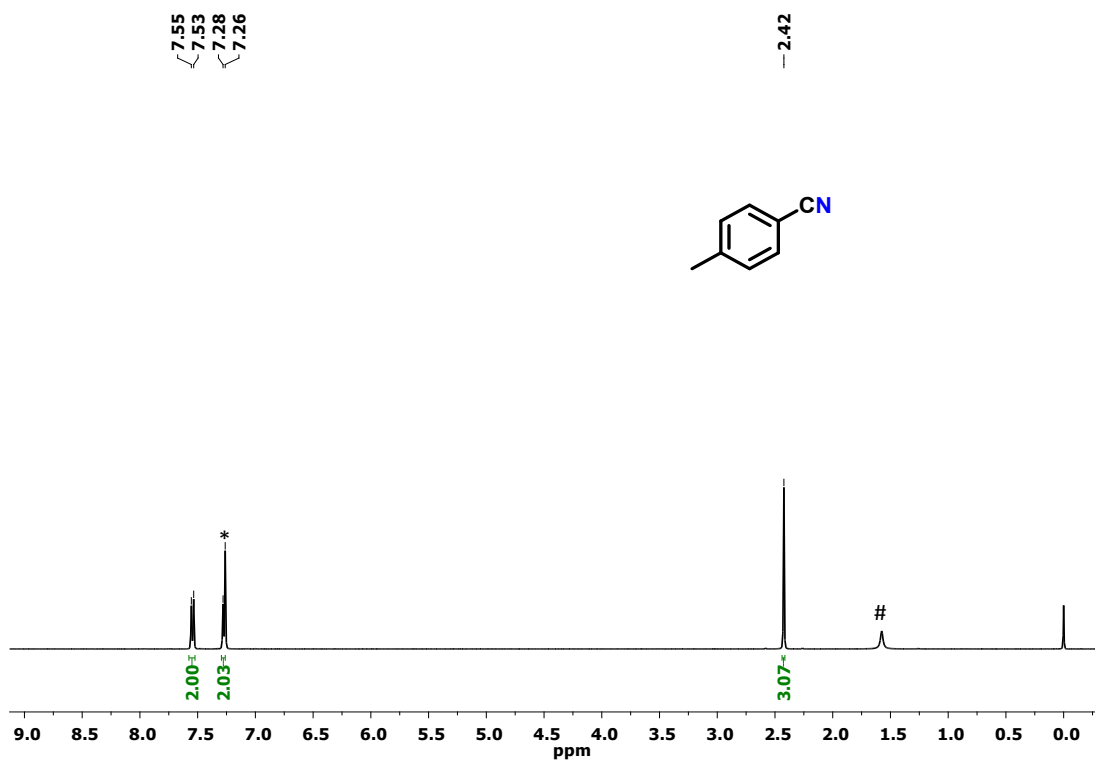

**Figure S47.**  $^1\text{H}$  NMR spectrum of 4-methylbenzonitrile (table 3, entry 2) in  $\text{CDCl}_3$ . \* and # represent  $\text{CDCl}_3$  and  $\text{H}_2\text{O}$  peaks, respectively.

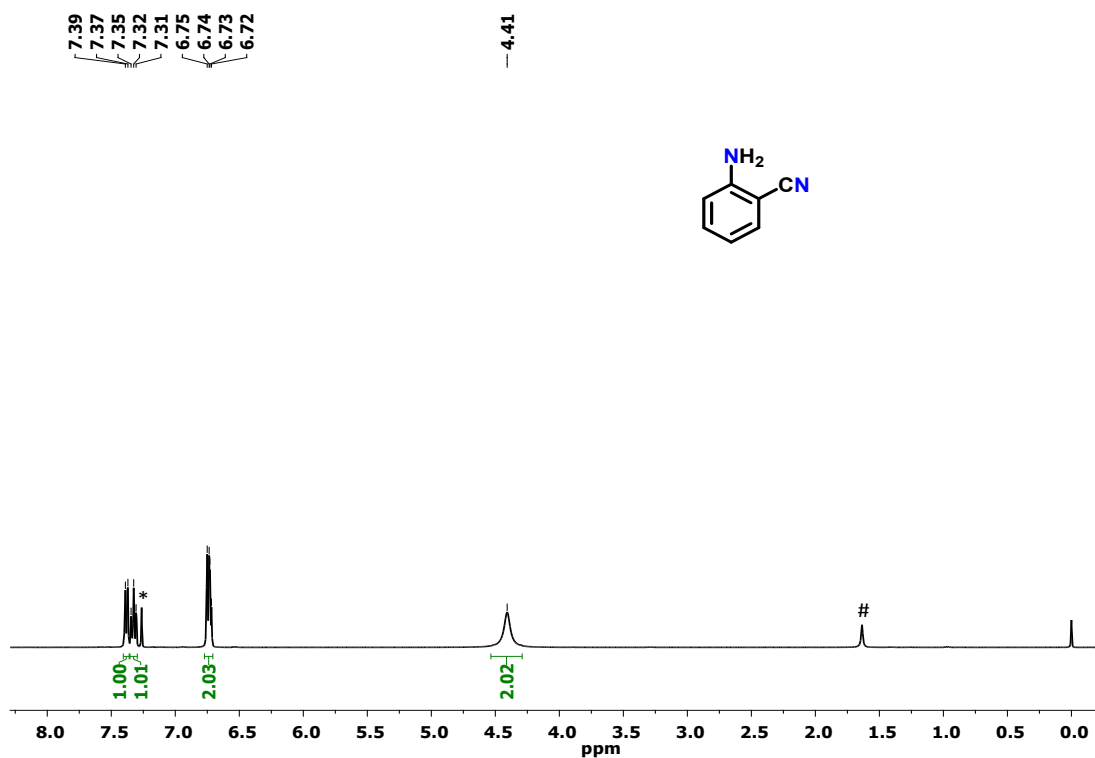

**Figure S48.**  $^1\text{H}$  NMR spectrum of 2-aminobenzonitrile (table 3, entry 3) in  $\text{CDCl}_3$ . \* and # represent  $\text{CDCl}_3$  and  $\text{H}_2\text{O}$  peaks, respectively.

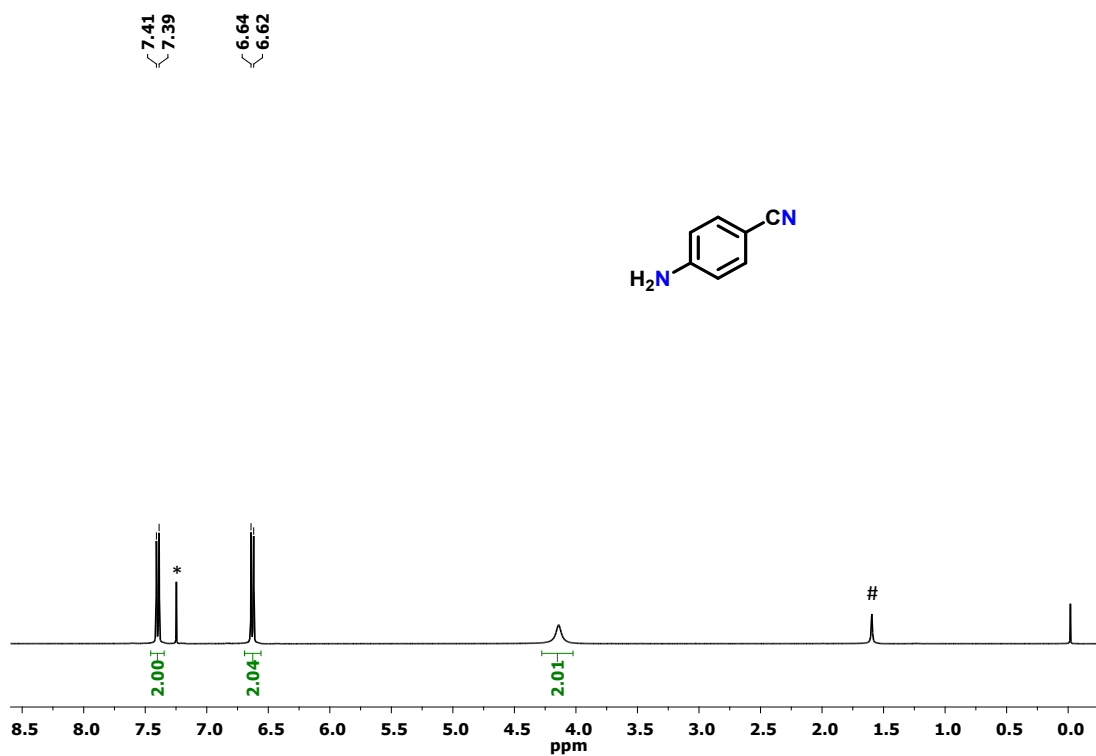

**Figure S49.**  $^1\text{H}$  NMR spectrum of 4-aminobenzonitrile (table 3, entry 4) in  $\text{CDCl}_3$ . \* and # represent  $\text{CDCl}_3$  and  $\text{H}_2\text{O}$  peaks, respectively.

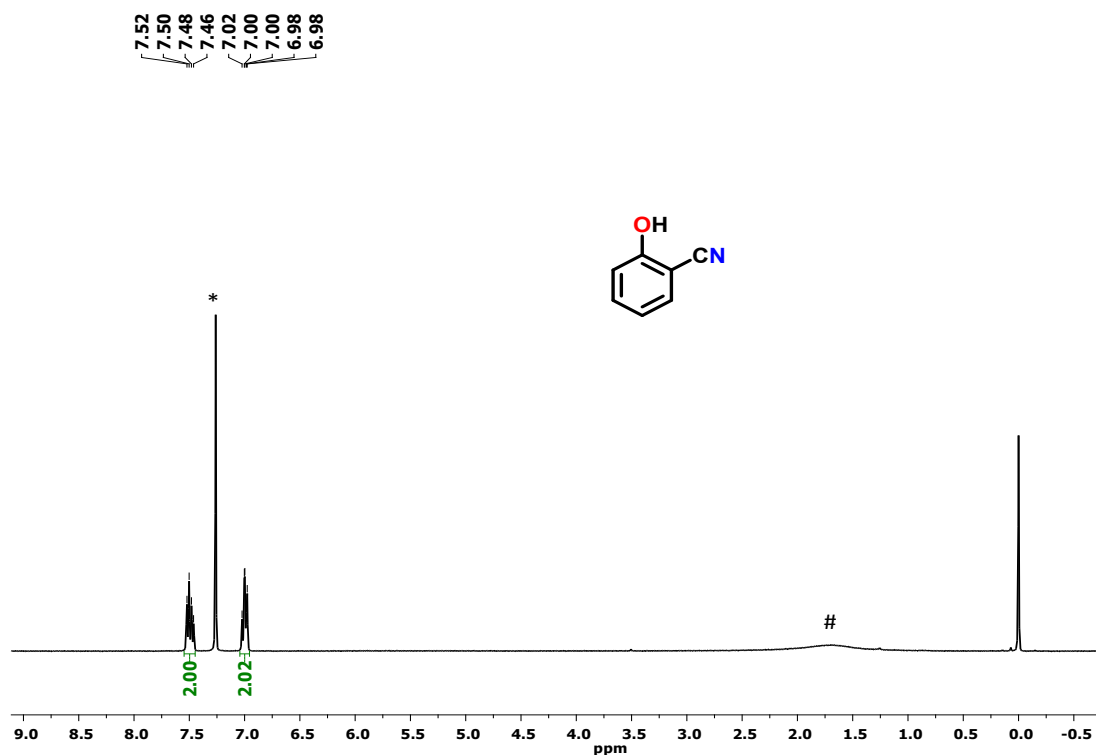

**Figure S50.**  $^1\text{H}$  NMR spectrum of 2-hydroxybenzonitrile (table 3, entry 5) in  $\text{CDCl}_3$ . \* and # represent  $\text{CDCl}_3$  and  $\text{H}_2\text{O}$  peaks, respectively.

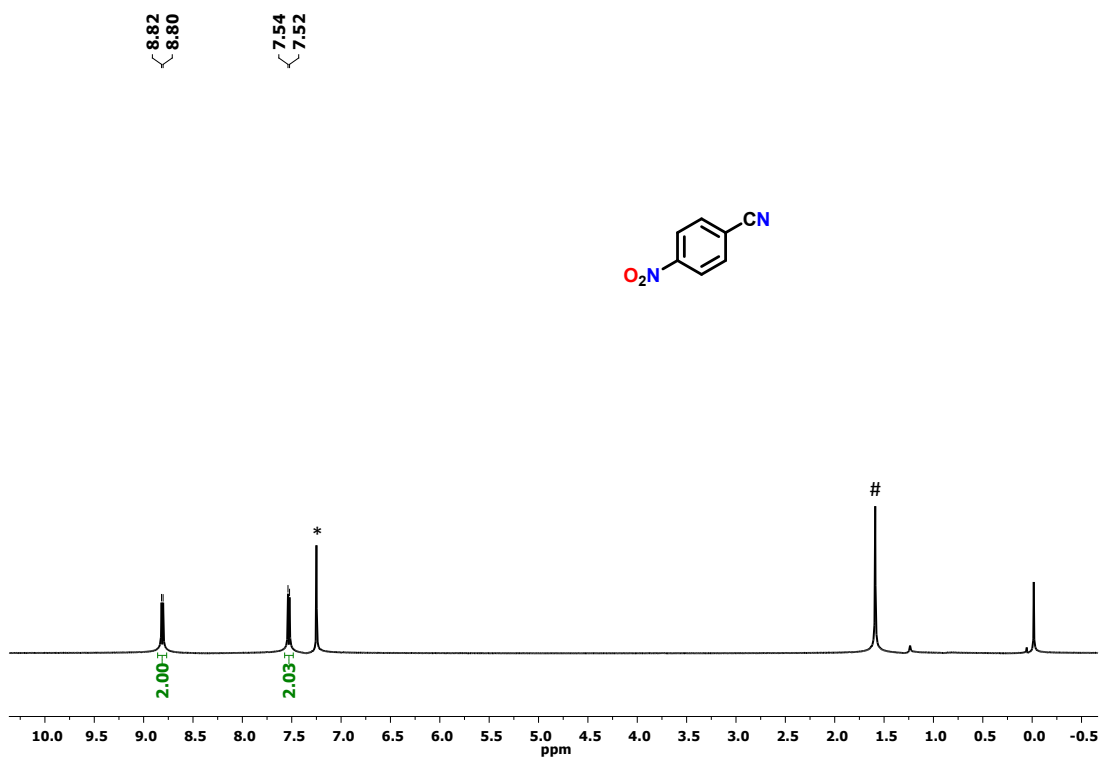

**Figure S51.**  $^1\text{H}$  NMR spectrum of 4-nitrobenzonitrile (table 3, entry 6) in  $\text{CDCl}_3$ . \* and # represent  $\text{CDCl}_3$  and  $\text{H}_2\text{O}$  peaks, respectively.

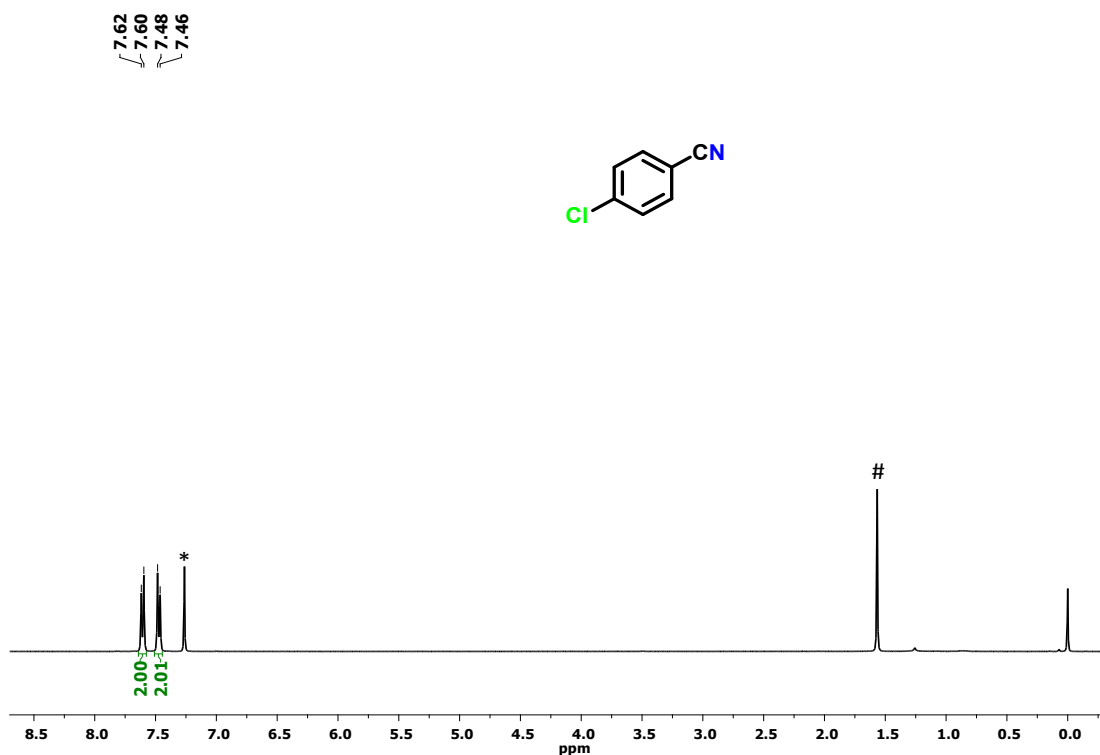

**Figure S52.**  $^1\text{H}$  NMR spectrum of 4-chlorobenzonitrile (table 3, entry 7) in  $\text{CDCl}_3$ . \* and # represent  $\text{CDCl}_3$  and  $\text{H}_2\text{O}$  peaks, respectively.

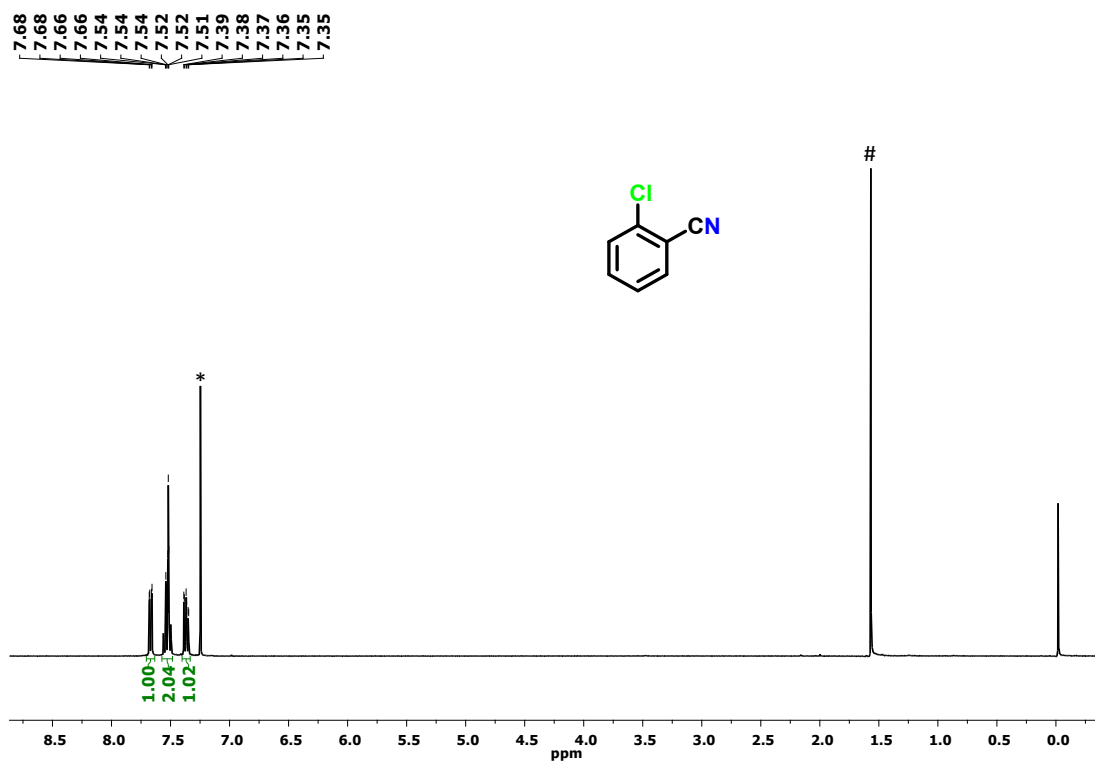

**Figure S53.**  $^1\text{H}$  NMR spectrum of 2-chlorobenzonitrile (table 3, entry 8) in  $\text{CDCl}_3$ . \* and # represent  $\text{CDCl}_3$  and  $\text{H}_2\text{O}$  peaks, respectively.

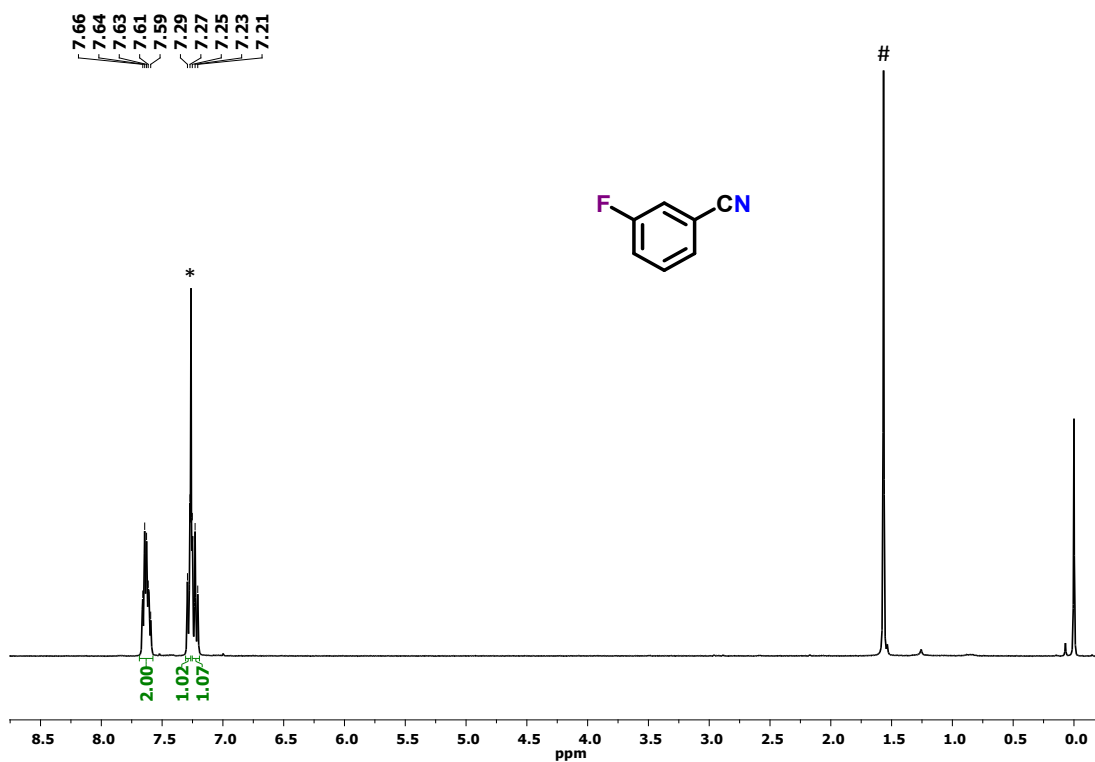

**Figure S54.**  $^1\text{H}$  NMR spectrum of 3-fluorobenzonitrile (table 3, entry 9) in  $\text{CDCl}_3$ . \* and # represent  $\text{CDCl}_3$  and  $\text{H}_2\text{O}$  peaks, respectively.

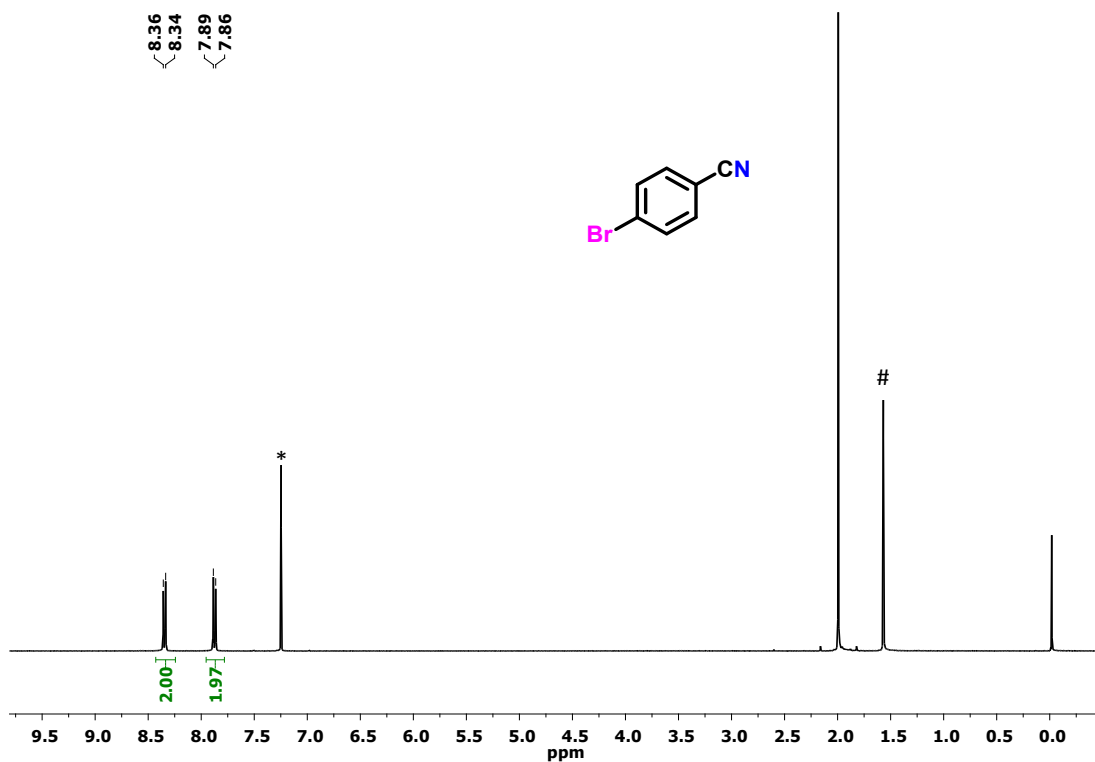

**Figure S55.**  $^1\text{H}$  NMR spectrum of 4-bromobenzonitrile (table 3, entry 10) in  $\text{CDCl}_3$ . \* and # represent  $\text{CDCl}_3$  and  $\text{H}_2\text{O}$  peaks, respectively.

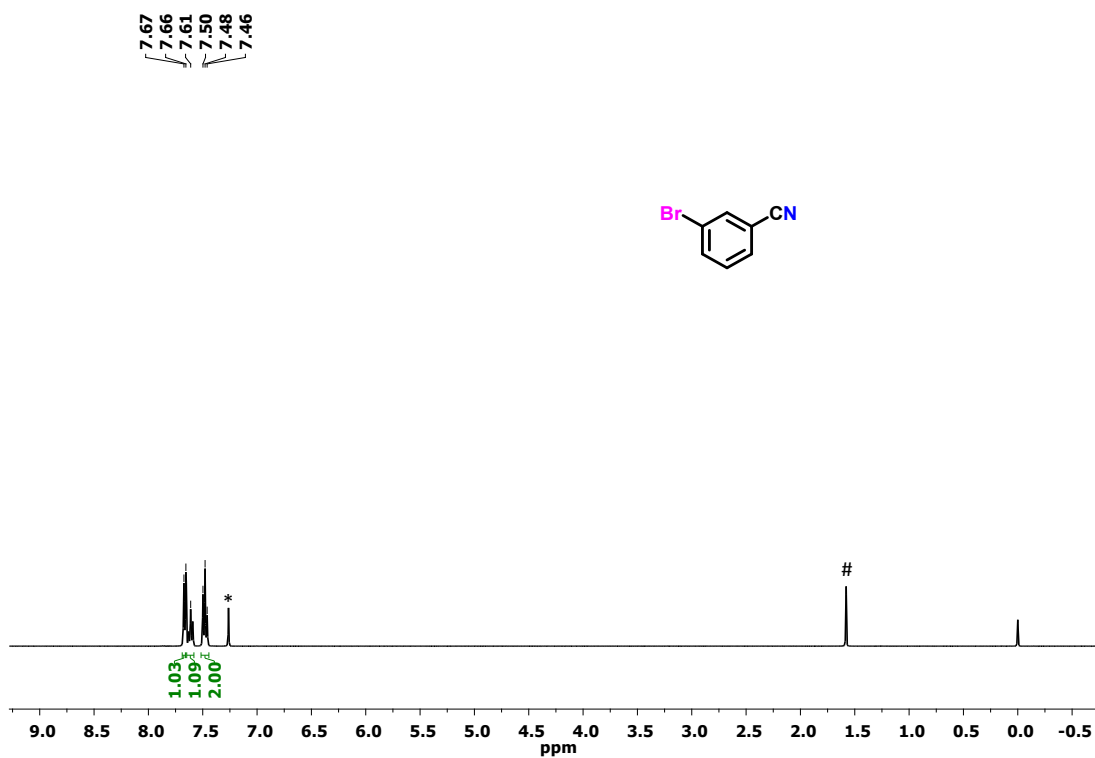

**Figure S56.**  $^1\text{H}$  NMR spectrum of 3-bromobenzonitrile (table 3, entry 11) in  $\text{CDCl}_3$ . \* and # represent  $\text{CDCl}_3$  and  $\text{H}_2\text{O}$  peaks, respectively.

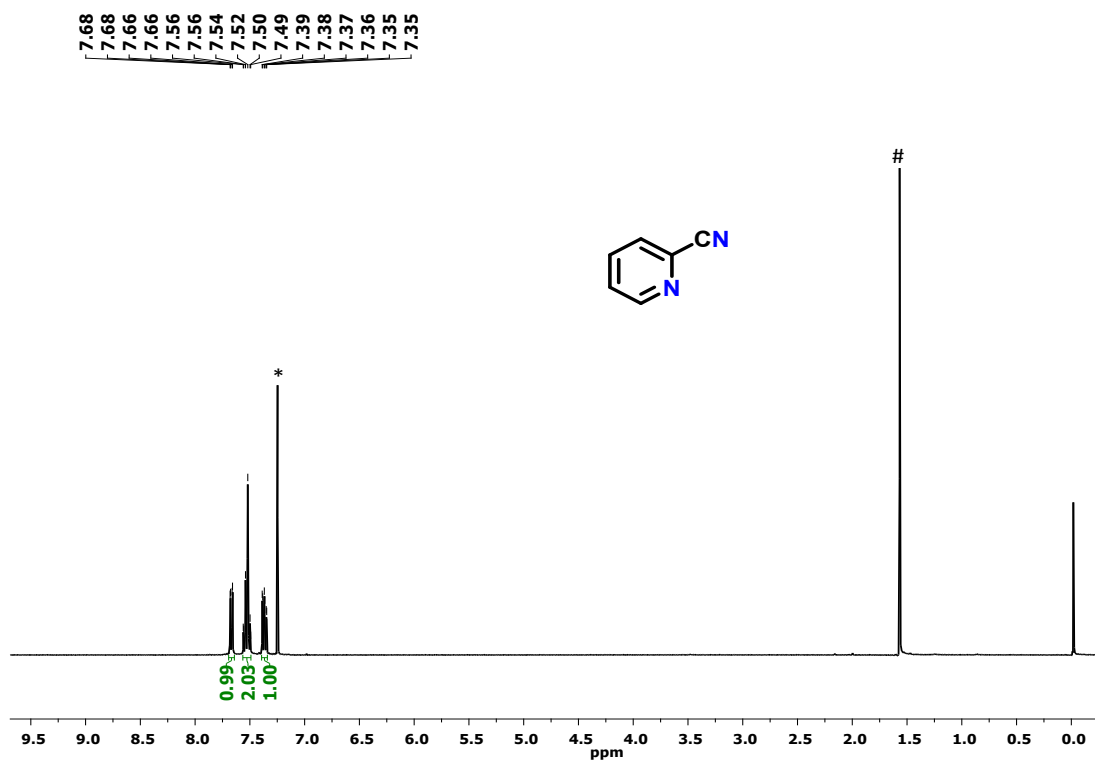

**Figure S57.**  $^1\text{H}$  NMR spectrum of picolinonitrile (table 3, entry 12) in  $\text{CDCl}_3$ . \* and # represent  $\text{CDCl}_3$  and  $\text{H}_2\text{O}$  peaks, respectively.

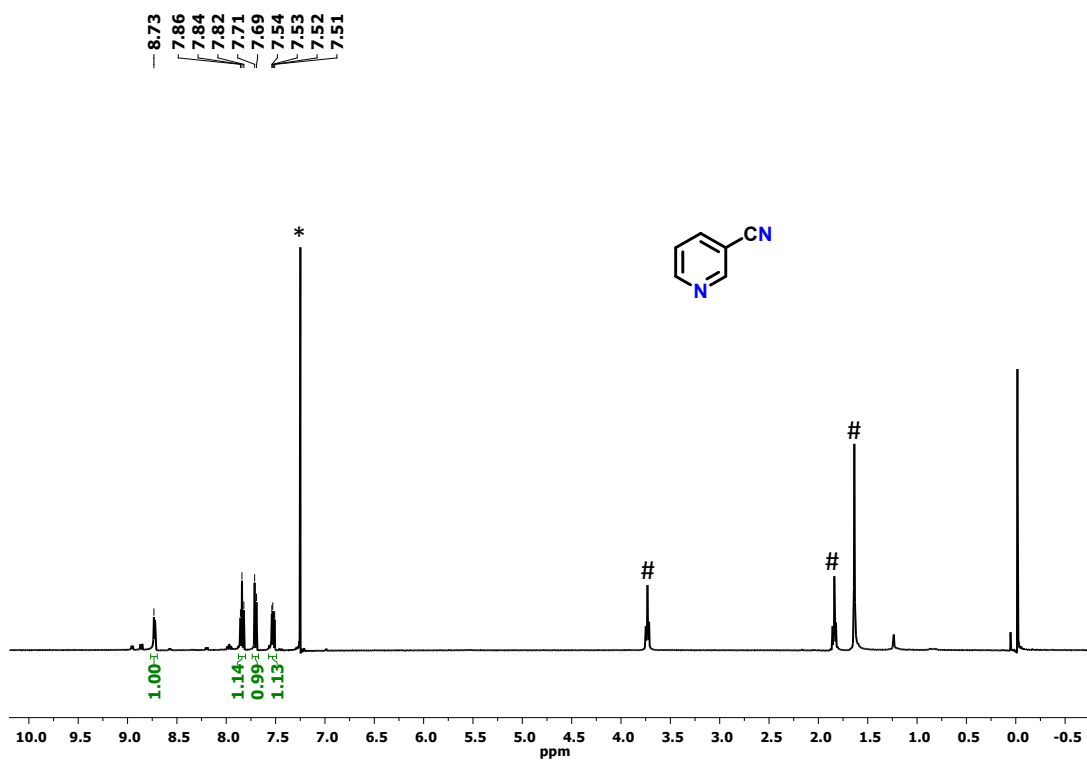

**Figure S58.**  $^1\text{H}$  NMR spectrum of nicotinonitrile (table 3, entry 13) in  $\text{CDCl}_3$ . \* and # represent  $\text{CDCl}_3$  and  $\text{H}_2\text{O}$ /residual solvent peaks, respectively.

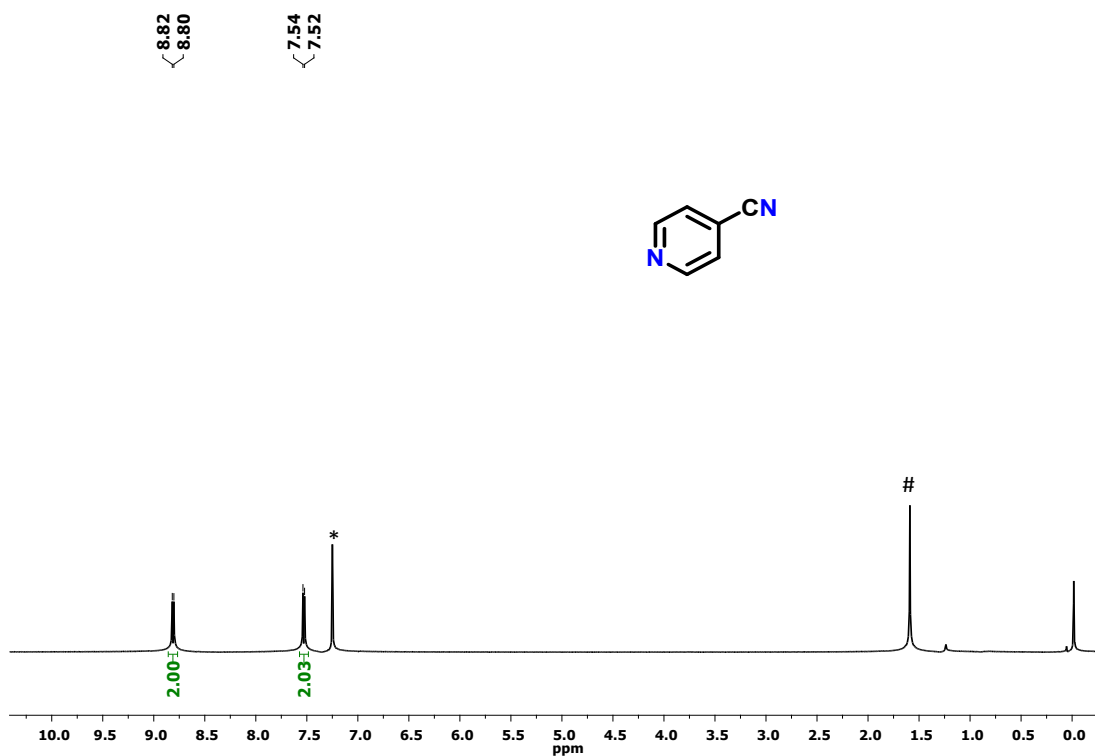

**Figure S59.**  $^1\text{H}$  NMR spectrum of isonicotinonitrile (table 3, entry 14) in  $\text{CDCl}_3$ . \* and # represent  $\text{CDCl}_3$  and  $\text{H}_2\text{O}$  peaks, respectively.

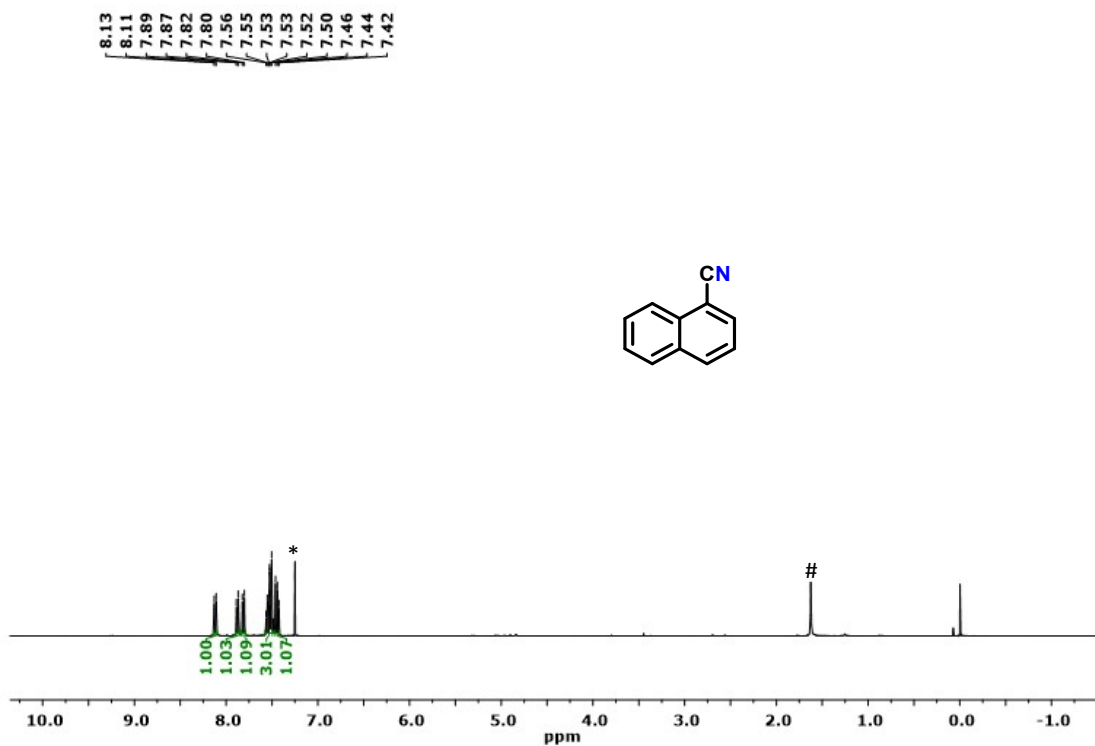

**Figure S60.**  $^1\text{H}$  NMR spectrum of 1-naphthonitrile (table 3, entry 15) in  $\text{CDCl}_3$ . \* and # represent  $\text{CDCl}_3$  and  $\text{H}_2\text{O}$  peaks, respectively.

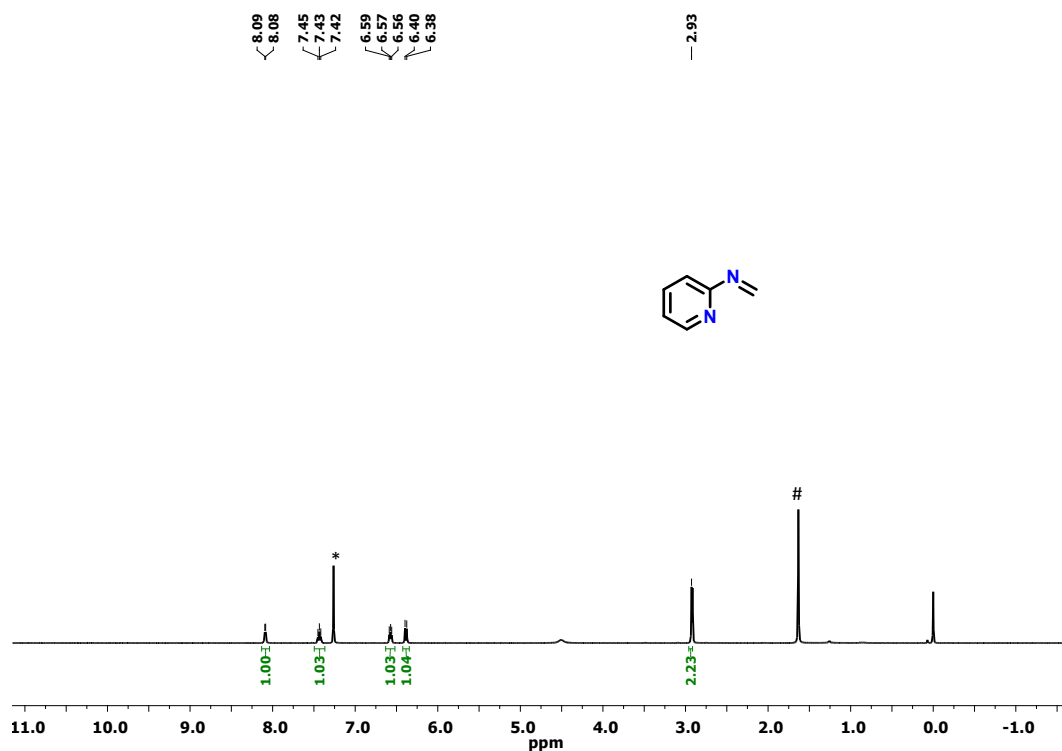

**Figure S61.** <sup>1</sup>H NMR spectrum of *N*-(pyridin-2-yl)methanimine (table 4, entry 1) in CDCl<sub>3</sub>. \* and # represent CDCl<sub>3</sub> and H<sub>2</sub>O peaks, respectively.

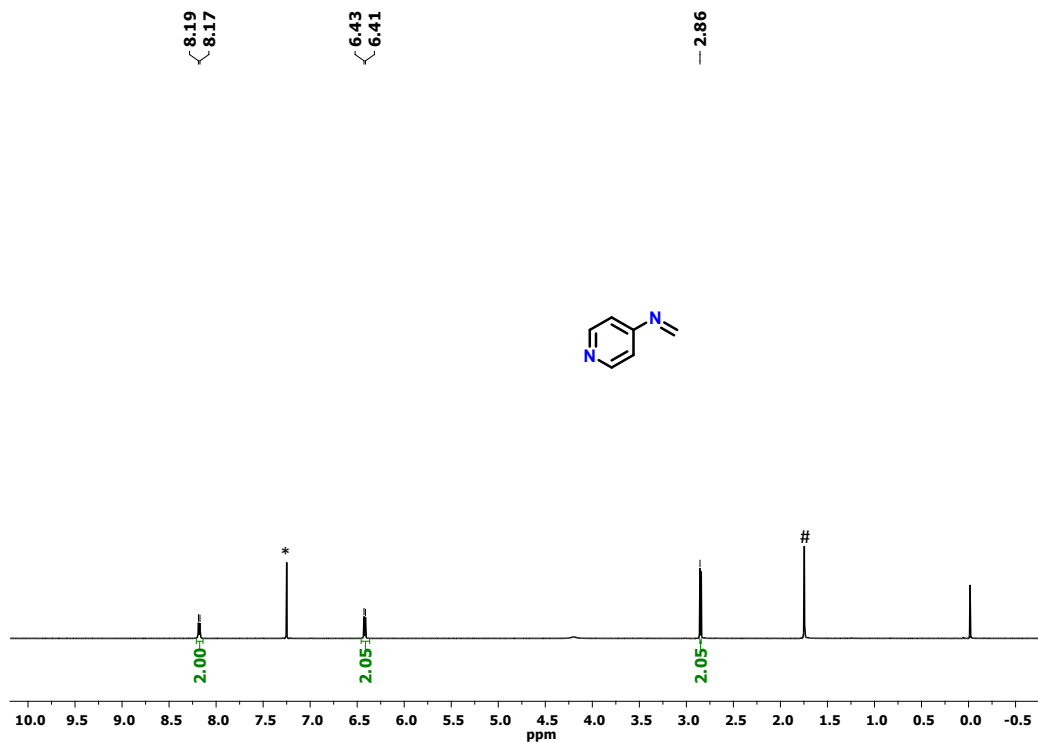

**Figure S62.** <sup>1</sup>H NMR spectrum of *N*-(pyridin-4-yl)methanimine (table 4, entry 2) in CDCl<sub>3</sub>. \* and # represent CDCl<sub>3</sub> and H<sub>2</sub>O peaks, respectively.



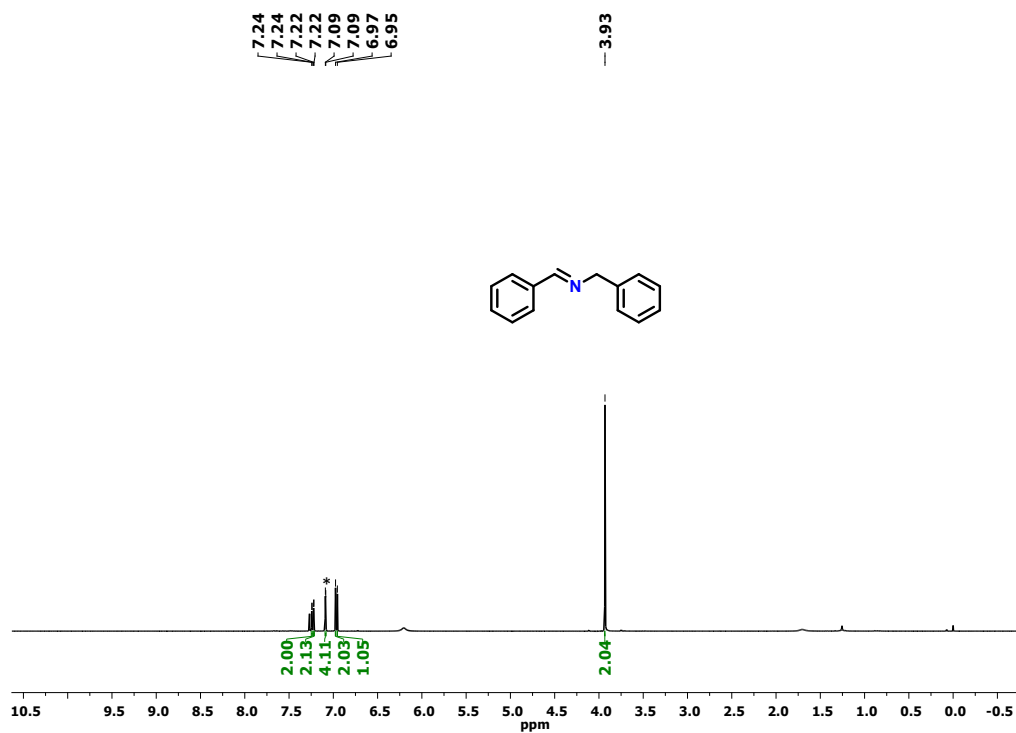

**Figure S63.**  $^1\text{H}$  NMR spectrum of *N*-benzyl-1-phenylmethanimine (table 4, entry 7) in  $\text{CDCl}_3$ . \* represents  $\text{CDCl}_3$  peak.

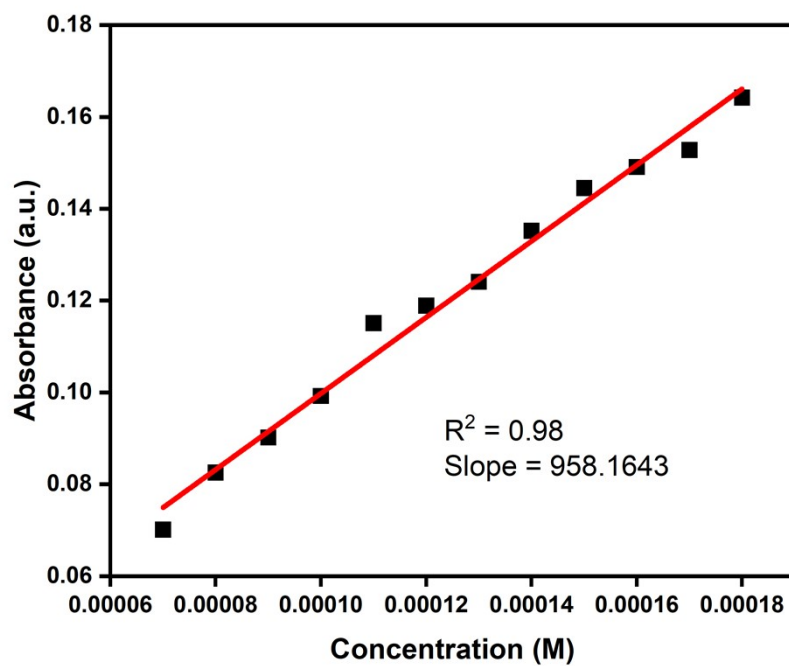

**Figure S64.** Plot of absorbance at  $\lambda = 400$  nm against concentration for the titration of complex **2** with benzylamine.

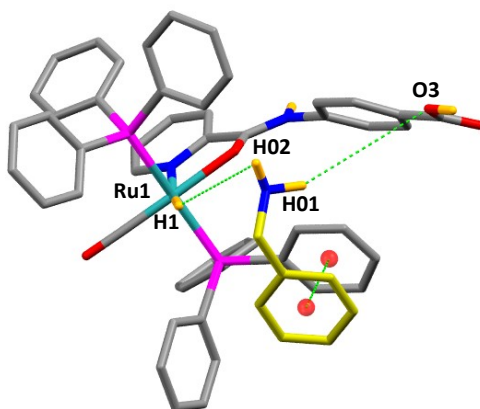

**Figure S65.** Molecular docking of complex **2** with a molecule of benzylamine (shown in yellow color) exhibiting hydrogen bonding, dihydrogen bonding, and  $\pi_{\text{arene}} \cdots \pi_{\text{arene}}$  interactions (shown by red dots). Only selected hydrogen atoms (in orange color) are shown for clarity. Selected heteroatom separations (Å): (a) O3...N, 3.41, Ru1...N, 2.8,  $\pi_{\text{arene}} \cdots \pi_{\text{arene}}$ , 2.62.

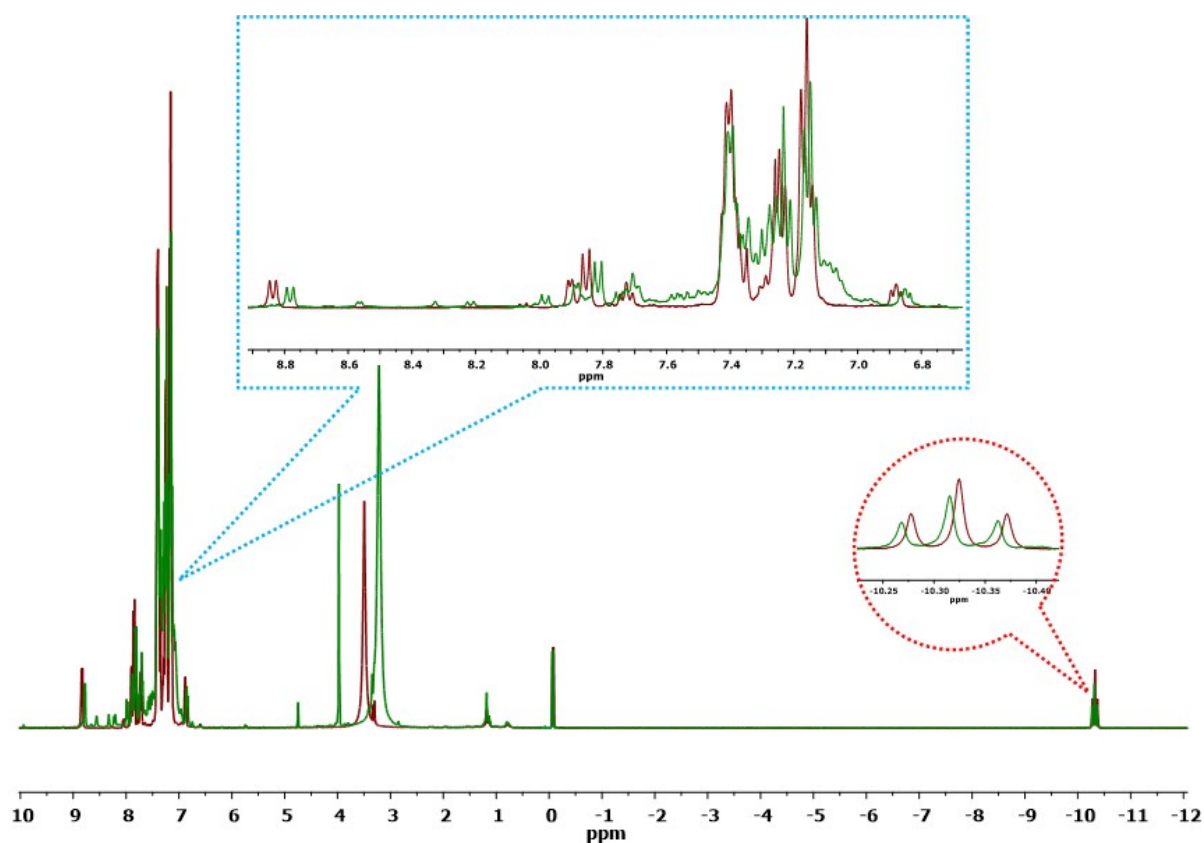

**Figure S66.** A comparison of  $^1\text{H}$  NMR spectra of complex **2** (brown trace) and a 1:1 mixture of complex **2** + benzylamine (green trace) recorded in  $\text{CDCl}_3$ .

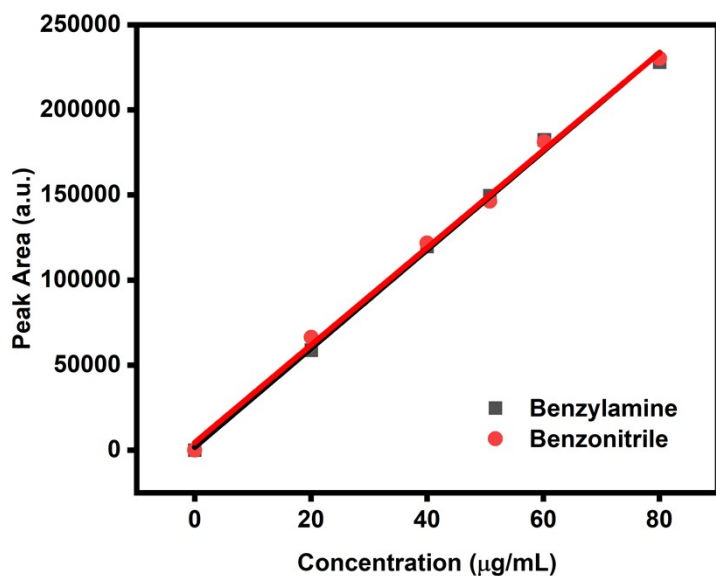

**Figure S67.** GC calibration plot for benzylamine and benzonitrile.

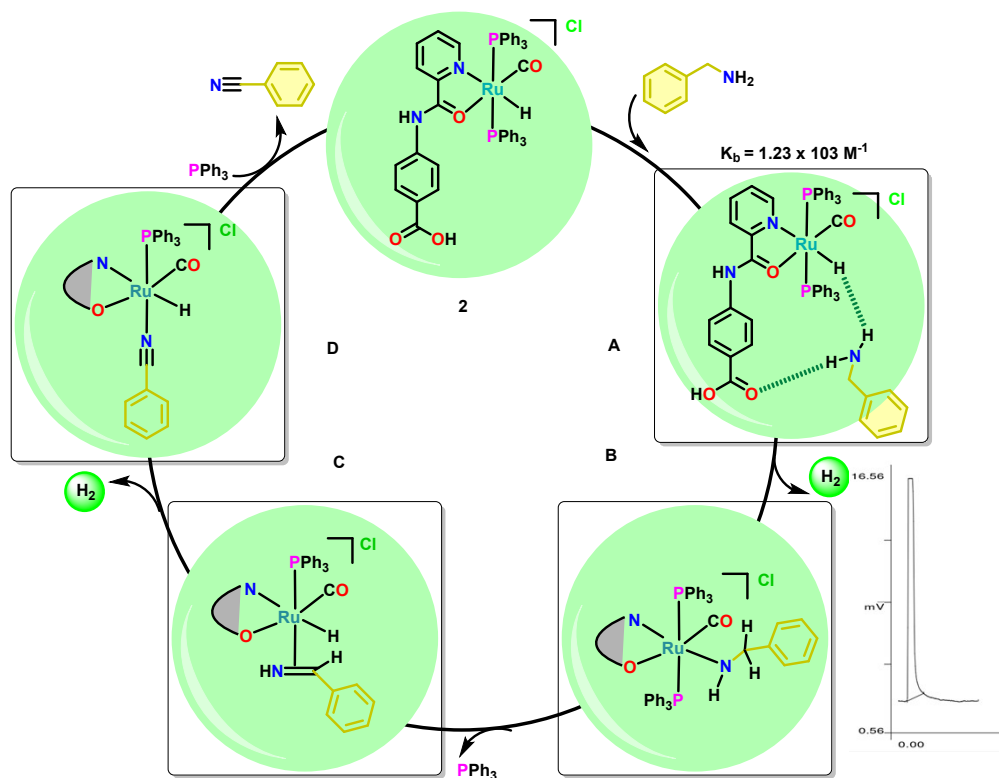

**Scheme S1.** Proposed reaction mechanism for the double dehydrogenation of benzylamine catalyzed by complex **2**. A gas chromatogram for the in-situ generated  $\text{H}_2$  is shown adjacent to panel 'B'.

**Table S1.** X-ray diffraction data collection and structure refinement parameters for complexes **2** and **3**.

|                                                            | <b>2·CH<sub>3</sub>OH</b>                                                         | <b>3·3CH<sub>3</sub>OH·H<sub>2</sub>O</b>                                         |
|------------------------------------------------------------|-----------------------------------------------------------------------------------|-----------------------------------------------------------------------------------|
| <b>CCDC No.</b>                                            | <b>2402741</b>                                                                    | <b>2402742</b>                                                                    |
| Empirical formula                                          | C <sub>52</sub> H <sub>49</sub> N <sub>2</sub> O <sub>6</sub> P <sub>2</sub> RuCl | C <sub>55</sub> H <sub>59</sub> N <sub>2</sub> O <sub>8</sub> P <sub>2</sub> RuCl |
| Formula weight                                             | 996.43                                                                            | 1073.55                                                                           |
| Temperature (K)                                            | 293(2)                                                                            | 293(2)                                                                            |
| Wavelength (Å)                                             | 0.71073                                                                           | 0.71073                                                                           |
| Crystal system                                             | Triclinic                                                                         | Monoclinic                                                                        |
| Space group                                                | <i>P</i> $\bar{1}$                                                                | <i>P</i> 2 <sub>1</sub> / <i>n</i>                                                |
| <i>a</i> (Å)                                               | 11.3027(3)                                                                        | 15.0241(2)                                                                        |
| <i>b</i> (Å)                                               | 12.3655(4)                                                                        | 19.0497(3)                                                                        |
| <i>c</i> (Å)                                               | 17.0464(5)                                                                        | 17.0542(3)                                                                        |
| $\alpha$ (°)                                               | 82.161(2)                                                                         | 90                                                                                |
| $\beta$ (°)                                                | 83.388(2)                                                                         | 97.7020(10)                                                                       |
| $\gamma$ (°)                                               | 77.112(3)                                                                         | 90                                                                                |
| Volume (Å <sup>3</sup> )                                   | 2291.87(12)                                                                       | 4836.96(13)                                                                       |
| <i>Z</i>                                                   | 2                                                                                 | 4                                                                                 |
| Density Mg/m <sup>3</sup> (calculated)                     | 1.397                                                                             | 1.345                                                                             |
| Absorption coefficient mm <sup>-1</sup>                    | 0.516                                                                             | 0.491                                                                             |
| <i>F</i> (000)                                             | 956                                                                               | 2008                                                                              |
| Crystal size (mm <sup>3</sup> )                            | 0.24 x 0.20 x 0.16                                                                | 0.25 x 0.19 x 0.16                                                                |
| Theta range for data collection                            | 3.403 to 24.998°                                                                  | 3.116 to 27.455°                                                                  |
| Index ranges                                               | -13<= <i>h</i> <=13, -14<= <i>k</i> <=14,<br>-20<= <i>l</i> <=20                  | -18<= <i>h</i> <=19, -24<= <i>k</i> <=24,<br>-22<= <i>l</i> <=21                  |
| Reflections collected                                      | 27963                                                                             | 73595                                                                             |
| Independent reflections                                    | 8085 [R(int) = 0.0362]                                                            | 11070 [R(int) = 0.0454]                                                           |
| Completeness to theta = 25°                                | 99.8 %                                                                            | 99.8 %                                                                            |
| Refinement method                                          | Full-matrix least-squares on <i>F</i> <sup>2</sup>                                | Full-matrix least-squares on <i>F</i> <sup>2</sup>                                |
| Data / restraints / parameters                             | 8085 / 176 / 579                                                                  | 10535 / 932 / 563                                                                 |
| Goodness of-fit on <i>F</i> <sup>2</sup>                   | 1.039                                                                             | 1.072                                                                             |
| Final R indices [ <i>I</i> >2σ( <i>I</i> )] <sup>a,b</sup> | <i>R</i> <sub>1</sub> = 0.0416, <i>wR</i> <sub>2</sub> = 0.0966                   | <i>R</i> <sub>1</sub> = 0.0315, <i>wR</i> <sub>2</sub> = 0.0824                   |
| <i>R</i> indices (all data)                                | <i>R</i> <sub>1</sub> = 0.0493, <i>wR</i> <sub>2</sub> = 0.1004                   | <i>R</i> <sub>1</sub> = 0.0405, <i>wR</i> <sub>2</sub> = 0.0859                   |
| Largest diff. peak and hole (e.Å <sup>-3</sup> )           | 1.081 and -0.607                                                                  | 0.382 and -0.437                                                                  |

<sup>a</sup>*R* =  $\Sigma||F_o| - |F_c|| / \Sigma|F_o|$ ; <sup>b</sup>*wR* =  $\{\Sigma[w(F_o^2 - F_c^2)^2] / \Sigma[wF_o^4]\}^{1/2}$

**Table S2.** Selected bond distances (Å) and bond angles (°) for complexes **2** and **3**.

| <b>Bond Length (Å)</b> | <b>2</b>  | <b>3</b>  |
|------------------------|-----------|-----------|
| Ru(1)-C(1)             | 1.843(4)  | 1.800(2)  |
| Ru(1)-N(1)             | 2.175(2)  | 2.174(15) |
| Ru(1)-O(1)             | 2.153(2)  | 2.164(11) |
| Ru(1)-P(1)             | 2.3584(8) | 2.3579(5) |
| Ru(1)-P(2)             | 2.3460(8) | 2.3565(5) |
| Ru(1)-H(1)             | 1.619(10) | 1.621(16) |

  

| <b>Bond Angles (°)</b> | <b>2</b>   | <b>3</b>    |
|------------------------|------------|-------------|
| C(1)-Ru(1)-O(1)        | 172.52(12) | 173.49(7)   |
| C(1)-Ru(1)-N(1)        | 98.54(13)  | 99.38(8)    |
| O(1)-Ru(1)-N(1)        | 74.19(8)   | 74.16(5)    |
| C(1)-Ru(1)-P(1)        | 89.54(11)  | 92.69(7)    |
| O(1)-Ru(1)-P(1)        | 89.31(6)   | 88.76(3)    |
| N(1)-Ru(1)-P(1)        | 94.51(7)   | 94.96(4)    |
| C(1)-Ru(1)-P(2)        | 91.01(11)  | 92.01(7)    |
| O(1)-Ru(1)-P(2)        | 91.11(6)   | 87.69(3)    |
| N(1)-Ru(1)-P(2)        | 92.95(7)   | 94.06(4)    |
| P(1)-Ru(1)-P(2)        | 172.36(3)  | 169.016(19) |
| C(1)-Ru(1)-H(1)        | 91.6(15)   | 86.4(6)     |
| O(1)-Ru(1)-H(1)        | 95.9(15)   | 100.0(6)    |
| N(1)-Ru(1)-H(1)        | 167.0(15)  | 174.2(6)    |
| P(1)-Ru(1)-H(1)        | 93.8(16)   | 85.5(5)     |
| P(2)-Ru(1)-H(1)        | 78.6(15)   | 84.9(6)     |

**Table S3.** Calculation of extinction coefficient using the concentration and absorbance at  $\lambda = 400$  nm for the titration of complex **2** with benzylamine.

| S.No. | Concentration (M)*10 <sup>-6</sup> | Absorbance (a.u.) | Extinction Coefficient, $\epsilon$ (M <sup>-1</sup> cm <sup>-1</sup> ) |
|-------|------------------------------------|-------------------|------------------------------------------------------------------------|
| 1     | 70                                 | 0.07011           | 1001.57                                                                |
| 2     | 80                                 | 0.08254           | 1031.75                                                                |
| 3     | 90                                 | 0.09021           | 1003.33                                                                |
| 4     | 100                                | 0.09923           | 992.3                                                                  |
| 5     | 110                                | 0.1151            | 1046.36                                                                |
| 6     | 120                                | 0.1189            | 990.83                                                                 |
| 7     | 130                                | 0.1241            | 954.61                                                                 |
| 8     | 140                                | 0.1352            | 965.71                                                                 |
| 9     | 150                                | 0.1445            | 963.33                                                                 |
| 10    | 160                                | 0.1491            | 931.87                                                                 |
| 11    | 170                                | 0.1528            | 898.82                                                                 |
| 12    | 180                                | 0.1642            | 911.66                                                                 |

**Table S4.** Computational data for the molecular docking studies of complex **2** with a molecule of benzylamine.

| Clst   | E <sub>total</sub>                        | E <sub>shape</sub> | E <sub>force</sub> | E <sub>air</sub> | Bmp    | RMS                     |
|--------|-------------------------------------------|--------------------|--------------------|------------------|--------|-------------------------|
| 1      | -126.4                                    | -126.4             | 0.0                | 0.0              | 1      | 1.00                    |
| REMARK | Docked receptor coordinates...            |                    |                    |                  |        |                         |
| REMARK | model "benzylamine", ID: 004a011a00080006 |                    |                    |                  |        |                         |
| HETATM | 1                                         | N                  | 1                  | 1.928            | 1.675  | 0.265 1.00 99.99        |
| HETATM | 2                                         | C                  | 1                  | 1.223            | 1.096  | -0.887 1.00 99.99       |
| HETATM | 3                                         | C                  | 1                  | 0.212            | 0.089  | -0.391 1.00 99.99       |
| HETATM | 4                                         | C                  | 1                  | 0.413            | -1.233 | -0.537 1.00 99.99       |
| HETATM | 5                                         | C                  | 1                  | -0.491           | -2.120 | -0.092 1.00 99.99       |
| HETATM | 6                                         | C                  | 1                  | -1.612           | -1.693 | 0.507 1.00 99.99        |
| HETATM | 7                                         | C                  | 1                  | -1.824           | -0.377 | 0.659 1.00 99.99        |
| HETATM | 8                                         | C                  | 1                  | -0.916           | 0.505  | 0.212 1.00 99.99        |
| HETATM | 9                                         | H                  | 1                  | 2.462            | 2.514  | -0.020 1.00 99.99       |
| HETATM | 10                                        | H                  | 1                  | 1.238            | 2.009  | 0.961 1.00 99.99        |
| HETATM | 11                                        | H                  | 1                  | 1.963            | 0.642  | -1.586 1.00 99.99       |
| HETATM | 12                                        | H                  | 1                  | 0.702            | 1.909  | -1.443 1.00 99.99       |
| HETATM | 13                                        | H                  | 1                  | 1.331            | -1.601 | -1.025 1.00 99.99       |
| HETATM | 14                                        | H                  | 1                  | -0.311           | -3.201 | -0.218 1.00 99.99       |
| HETATM | 15                                        | H                  | 1                  | -2.356           | -2.420 | 0.874 1.00 99.99        |
| HETATM | 16                                        | H                  | 1                  | -2.744           | -0.020 | 1.152 1.00 99.99        |
| HETATM | 17                                        | H                  | 1                  | -1.102           | 1.584  | 0.344 1.00 99.99        |
| REMARK | Docked ligand coordinates...              |                    |                    |                  |        |                         |
| REMARK | model "complex 2", ID: 004a011a00080006   |                    |                    |                  |        |                         |
| HETATM | 18                                        | Ru1                | UNK                | 1                | 4.605  | -1.471 1.290 1.00 2.58  |
| HETATM | 19                                        | P2                 | UNK                | 1                | 6.430  | -0.098 0.751 1.00 2.55  |
| HETATM | 20                                        | P1                 | UNK                | 1                | 2.611  | -2.691 1.613 1.00 2.67  |
| HETATM | 21                                        | O2                 | UNK                | 1                | 4.004  | -0.129 2.862 1.00 2.83  |
| HETATM | 22                                        | N2                 | UNK                | 1                | 3.685  | 0.106 5.082 1.00 3.06   |
| HETATM | 23                                        | H6                 | UNK                | 1                | 3.925  | -0.145 5.868 1.00 3.63  |
| HETATM | 24                                        | O4                 | UNK                | 1                | -0.339 | 4.795 3.654 1.00 5.88   |
| HETATM | 25                                        | H7                 | UNK                | 1                | -0.991 | 5.292 3.634 1.00 8.84   |
| HETATM | 26                                        | N1                 | UNK                | 1                | 5.556  | -2.215 3.098 1.00 2.74  |
| HETATM | 27                                        | O3                 | UNK                | 1                | -1.419 | 3.927 5.377 1.00 6.88   |
| HETATM | 28                                        | C10                | UNK                | 1                | 2.795  | 2.138 4.051 1.00 3.15   |
| HETATM | 29                                        | H10                | UNK                | 1                | 3.543  | 2.194 3.502 1.00 3.79   |
| HETATM | 30                                        | C11                | UNK                | 1                | 1.790  | 3.078 3.950 1.00 3.17   |
| HETATM | 31                                        | H11                | UNK                | 1                | 1.862  | 3.770 3.334 1.00 3.79   |
| HETATM | 32                                        | C45                | UNK                | 1                | 1.157  | -1.745 2.179 1.00 3.06  |
| HETATM | 33                                        | C12                | UNK                | 1                | 0.668  | 2.992 4.769 1.00 3.28   |
| HETATM | 34                                        | C27                | UNK                | 1                | 7.923  | -0.565 1.663 1.00 2.71  |
| HETATM | 35                                        | C9                 | UNK                | 1                | 2.683  | 1.107 4.973 1.00 2.96   |
| HETATM | 36                                        | C23                | UNK                | 1                | 6.981  | -0.098 -1.004 1.00 3.00 |
| HETATM | 37                                        | C33                | UNK                | 1                | 1.948  | -3.619 0.173 1.00 3.12  |
| HETATM | 38                                        | O1                 | UNK                | 1                | 5.584  | -3.591 -0.574 1.00 6.02 |
| HETATM | 39                                        | C15                | UNK                | 1                | 6.174  | 1.686 1.047 1.00 3.30   |
| HETATM | 40                                        | C38                | UNK                | 1                | 2.272  | -3.221 -1.106 1.00 3.64 |
| HETATM | 41                                        | H38                | UNK                | 1                | 2.860  | -2.511 -1.235 1.00 4.34 |
| HETATM | 42                                        | C50                | UNK                | 1                | 1.105  | -0.376 2.031 1.00 3.35  |

|        |     |     |     |   |        |        |        |      |       |
|--------|-----|-----|-----|---|--------|--------|--------|------|-------|
| HETATM | 43  | H50 | UNK | 1 | 1.838  | 0.066  | 1.665  | 1.00 | 4.03  |
| HETATM | 44  | C37 | UNK | 1 | 1.721  | -3.878 | -2.209 | 1.00 | 4.29  |
| HETATM | 45  | H37 | UNK | 1 | 1.948  | -3.607 | -3.071 | 1.00 | 5.13  |
| HETATM | 46  | C7  | UNK | 1 | 4.273  | -0.461 | 4.034  | 1.00 | 2.72  |
| HETATM | 47  | C26 | UNK | 1 | 7.774  | 0.053  | -3.660 | 1.00 | 4.72  |
| HETATM | 48  | H26 | UNK | 1 | 8.033  | 0.110  | -4.551 | 1.00 | 5.68  |
| HETATM | 49  | C5  | UNK | 1 | 7.087  | -3.556 | 4.328  | 1.00 | 4.81  |
| HETATM | 50  | H3  | UNK | 1 | 7.697  | -4.258 | 4.340  | 1.00 | 5.76  |
| HETATM | 51  | C34 | UNK | 1 | 1.069  | -4.664 | 0.331  | 1.00 | 4.30  |
| HETATM | 52  | H34 | UNK | 1 | 0.833  | -4.945 | 1.185  | 1.00 | 5.13  |
| HETATM | 53  | C13 | UNK | 1 | 0.596  | 1.981  | 5.716  | 1.00 | 4.13  |
| HETATM | 54  | H13 | UNK | 1 | -0.138 | 1.934  | 6.287  | 1.00 | 4.97  |
| HETATM | 55  | C28 | UNK | 1 | 8.195  | -0.054 | 2.924  | 1.00 | 3.53  |
| HETATM | 56  | H28 | UNK | 1 | 7.675  | 0.636  | 3.269  | 1.00 | 4.26  |
| HETATM | 57  | C42 | UNK | 1 | 3.708  | -5.735 | 4.826  | 1.00 | 13.72 |
| HETATM | 58  | H42 | UNK | 1 | 3.995  | -6.332 | 5.481  | 1.00 | 16.50 |
| HETATM | 59  | C39 | UNK | 1 | 2.864  | -3.962 | 2.873  | 1.00 | 4.30  |
| HETATM | 60  | C20 | UNK | 1 | 7.221  | 2.560  | 1.222  | 1.00 | 4.51  |
| HETATM | 61  | H20 | UNK | 1 | 8.092  | 2.238  | 1.260  | 1.00 | 5.45  |
| HETATM | 62  | C21 | UNK | 1 | 6.186  | -0.621 | -2.004 | 1.00 | 4.06  |
| HETATM | 63  | H21 | UNK | 1 | 5.375  | -1.021 | -1.788 | 1.00 | 4.82  |
| HETATM | 64  | C36 | UNK | 1 | 0.862  | -4.908 | -2.035 | 1.00 | 4.59  |
| HETATM | 65  | H36 | UNK | 1 | 0.497  | -5.342 | -2.773 | 1.00 | 5.53  |
| HETATM | 66  | C22 | UNK | 1 | 8.189  | 0.499  | -1.357 | 1.00 | 3.89  |
| HETATM | 67  | H22 | UNK | 1 | 8.743  | 0.852  | -0.699 | 1.00 | 4.66  |
| HETATM | 68  | C6  | UNK | 1 | 6.445  | -3.221 | 3.161  | 1.00 | 3.62  |
| HETATM | 69  | H2  | UNK | 1 | 6.634  | -3.704 | 2.388  | 1.00 | 4.34  |
| HETATM | 70  | C3  | UNK | 1 | 5.901  | -1.831 | 5.425  | 1.00 | 4.16  |
| HETATM | 71  | H5  | UNK | 1 | 5.706  | -1.337 | 6.189  | 1.00 | 4.97  |
| HETATM | 72  | C32 | UNK | 1 | 8.703  | -1.606 | 1.180  | 1.00 | 3.66  |
| HETATM | 73  | H32 | UNK | 1 | 8.524  | -1.966 | 0.340  | 1.00 | 4.42  |
| HETATM | 74  | C24 | UNK | 1 | 6.591  | -0.551 | -3.328 | 1.00 | 4.88  |
| HETATM | 75  | H24 | UNK | 1 | 6.055  | -0.917 | -3.995 | 1.00 | 5.84  |
| HETATM | 76  | C2  | UNK | 1 | 5.281  | -1.549 | 4.237  | 1.00 | 2.86  |
| HETATM | 77  | C25 | UNK | 1 | 8.566  | 0.569  | -2.690 | 1.00 | 4.44  |
| HETATM | 78  | H25 | UNK | 1 | 9.372  | 0.974  | -2.921 | 1.00 | 5.29  |
| HETATM | 79  | C30 | UNK | 1 | 10.024 | -1.589 | 3.166  | 1.00 | 4.89  |
| HETATM | 80  | H30 | UNK | 1 | 10.741 | -1.915 | 3.659  | 1.00 | 5.84  |
| HETATM | 81  | C8  | UNK | 1 | 1.606  | 1.039  | 5.819  | 1.00 | 3.85  |
| HETATM | 82  | H8  | UNK | 1 | 1.556  | 0.366  | 6.459  | 1.00 | 4.66  |
| HETATM | 83  | C31 | UNK | 1 | 9.747  | -2.115 | 1.941  | 1.00 | 4.65  |
| HETATM | 84  | H31 | UNK | 1 | 10.261 | -2.818 | 1.613  | 1.00 | 5.61  |
| HETATM | 85  | C49 | UNK | 1 | -0.002 | 0.356  | 2.408  | 1.00 | 4.68  |
| HETATM | 86  | H49 | UNK | 1 | -0.018 | 1.280  | 2.295  | 1.00 | 5.61  |
| HETATM | 87  | C1  | UNK | 1 | 5.200  | -2.771 | 0.110  | 1.00 | 3.83  |
| HETATM | 88  | C14 | UNK | 1 | -0.469 | 3.946  | 4.646  | 1.00 | 3.97  |
| HETATM | 89  | C29 | UNK | 1 | 9.243  | -0.572 | 3.677  | 1.00 | 4.66  |
| HETATM | 90  | H29 | UNK | 1 | 9.418  | -0.232 | 4.525  | 1.00 | 5.61  |
| HETATM | 91  | C16 | UNK | 1 | 4.876  | 2.197  | 1.009  | 1.00 | 4.00  |
| HETATM | 92  | H16 | UNK | 1 | 4.159  | 1.615  | 0.902  | 1.00 | 4.82  |
| HETATM | 93  | C4  | UNK | 1 | 6.824  | -2.856 | 5.473  | 1.00 | 5.27  |
| HETATM | 94  | H4  | UNK | 1 | 7.258  | -3.066 | 6.267  | 1.00 | 6.32  |
| HETATM | 95  | C35 | UNK | 1 | 0.532  | -5.302 | -0.779 | 1.00 | 5.06  |
| HETATM | 96  | H35 | UNK | 1 | -0.060 | -6.009 | -0.661 | 1.00 | 6.08  |
| HETATM | 97  | C47 | UNK | 1 | -1.058 | -1.653 | 3.113  | 1.00 | 6.41  |
| HETATM | 98  | H47 | UNK | 1 | -1.793 | -2.087 | 3.482  | 1.00 | 7.66  |
| HETATM | 99  | C46 | UNK | 1 | 0.057  | -2.386 | 2.726  | 1.00 | 4.89  |
| HETATM | 100 | H46 | UNK | 1 | 0.065  | -3.309 | 2.833  | 1.00 | 5.84  |
| HETATM | 101 | C48 | UNK | 1 | -1.076 | -0.293 | 2.951  | 1.00 | 6.12  |
| HETATM | 102 | H48 | UNK | 1 | -1.825 | 0.192  | 3.213  | 1.00 | 7.34  |
| HETATM | 103 | C19 | UNK | 1 | 6.976  | 3.940  | 1.342  | 1.00 | 6.10  |
| HETATM | 104 | H19 | UNK | 1 | 7.683  | 4.534  | 1.450  | 1.00 | 7.34  |

|  |                    |   |       |        |        |      |       |
|--|--------------------|---|-------|--------|--------|------|-------|
|  | HETATM 105 C40 UNK | 1 | 3.499 | -5.121 | 2.516  | 1.00 | 6.84  |
|  | HETATM 106 H40 UNK | 1 | 3.667 | -5.305 | 1.620  | 1.00 | 8.21  |
|  | HETATM 107 C17 UNK | 1 | 4.640 | 3.547  | 1.123  | 1.00 | 5.33  |
|  | HETATM 108 H17 UNK | 1 | 3.770 | 3.873  | 1.083  | 1.00 | 6.40  |
|  | HETATM 109 C18 UNK | 1 | 5.680 | 4.402  | 1.297  | 1.00 | 6.39  |
|  | HETATM 110 H18 UNK | 1 | 5.515 | 5.313  | 1.387  | 1.00 | 7.66  |
|  | HETATM 111 C44 UNK | 1 | 2.670 | -3.669 | 4.199  | 1.00 | 6.73  |
|  | HETATM 112 H44 UNK | 1 | 2.253 | -2.878 | 4.457  | 1.00 | 8.05  |
|  | HETATM 113 C41 UNK | 1 | 3.890 | -6.016 | 3.490  | 1.00 | 11.95 |
|  | HETATM 114 H41 UNK | 1 | 4.284 | -6.820 | 3.242  | 1.00 | 14.37 |
|  | HETATM 115 C43 UNK | 1 | 3.118 | -4.600 | 5.160  | 1.00 | 11.11 |
|  | HETATM 116 H43 UNK | 1 | 2.993 | -4.407 | 6.060  | 1.00 | 13.34 |
|  | HETATM 117 H1 UNK  | 1 | 3.918 | -0.404 | -0.132 | 1.00 | -0.08 |
|  | HETATM 118 C11 UNK | 1 | 3.780 | -0.997 | 8.113  | 1.00 | 5.76  |
